# Supplementary material
Source: PubMed Central journal article supplement (PMC6590514)
Supplement: NIHMS1017233-supplement-Supplemental_data_1.pdf [file NIHMS1017233-supplement-Supplemental_data_1.pdf]

<html><head></head><body><pre style="word-wrap: break-word; white-space: pre-wrap;">#  
 Barlow et al. Supplementary Data 1: D-statistic tests for unequal allele derived sharing  
 between brown and polar bears and a cave bear candidate introgressor  
 # Positive values are consistent with admixture between the P2 and P3 individuals, and  
 negative values between P1 and P3 individuals.  
 # D values, weighted block jackknife standard error, and Zscore, calculated using 4  
 alternative outgroups are presented in adjacent columns with prefix "D", "SE" and "Z",  
 respectively.  
 # Outgroups are indicated by their latin name

| P1           | P2   | P3           | Damericanus  | Dthibetanus   | Dornatus    | Dmelanoleuca |
|--------------|------|--------------|--------------|---------------|-------------|--------------|
| SEamericanus |      | SEthibetanus | SEornatus    | SEmelanoleuca | Zamericanus |              |
| Zthibetanus  |      | Zornatus     | Zmelanoleuca |               |             |              |
| NB           | 235  | GS136        | 0.079782     | 0.037504      | 0.035555    | 0.033767     |
| 0.009739     |      | 0.008964     | 0.008719     | 0.008407      | 8.192120    | 4.183884     |
| 4.077876     |      | 4.016391     |              |               |             |              |
| NB           | 235  | HV74         | 0.079545     | 0.038995      | 0.043102    | 0.043059     |
| 0.009109     |      | 0.008142     | 0.007735     | 0.007568      | 8.732300    | 4.789154     |
| 5.572402     |      | 5.689429     |              |               |             |              |
| NB           | 235  | VD-1838      | 0.070900     | 0.032561      | 0.034387    | 0.033738     |
| 0.009347     |      | 0.008284     | 0.008012     | 0.007687      | 7.585540    | 3.930621     |
| 4.292043     |      | 4.389031     |              |               |             |              |
| NB           | 235  | WK01         | 0.072318     | 0.033189      | 0.037038    | 0.035233     |
| 0.009206     |      | 0.008182     | 0.007748     | 0.007454      | 7.855598    | 4.056602     |
| 4.780111     |      | 4.726607     |              |               |             |              |
| SB           | 235  | GS136        | 0.079999     | 0.037302      | 0.044978    | 0.041639     |
| 0.009856     |      | 0.009187     | 0.008638     | 0.008425      | 8.116669    | 4.060354     |
| 5.206747     |      | 4.942517     |              |               |             |              |
| SB           | 235  | HV74         | 0.083425     | 0.040378      | 0.053689    | 0.052105     |
| 0.009372     |      | 0.008393     | 0.007880     | 0.007589      | 8.901553    | 4.810668     |
| 6.812956     |      | 6.865865     |              |               |             |              |
| SB           | 235  | VD-1838      | 0.074702     | 0.034803      | 0.044858    | 0.044274     |
| 0.009701     |      | 0.008514     | 0.008196     | 0.007877      | 7.700807    | 4.087959     |
| 5.473090     |      | 5.620477     |              |               |             |              |
| SB           | 235  | WK01         | 0.078687     | 0.036533      | 0.047893    | 0.045499     |
| 0.009358     |      | 0.008340     | 0.007716     | 0.007448      | 8.408819    | 4.380473     |
| 6.207335     |      | 6.108593     |              |               |             |              |
| WH2          | 235  | GS136        | 0.076561     | 0.032863      | 0.035028    | 0.033441     |
| 0.009952     |      | 0.009075     | 0.008930     | 0.008549      | 7.692652    | 3.621321     |
| 3.922326     |      | 3.911768     |              |               |             |              |
| WH2          | 235  | HV74         | 0.081178     | 0.039986      | 0.047746    | 0.047749     |
| 0.009340     |      | 0.008390     | 0.008071     | 0.007786      | 8.691573    | 4.765852     |
| 5.915811     |      | 6.132987     |              |               |             |              |
| WH2          | 235  | VD-1838      | 0.069730     | 0.032703      | 0.038966    | 0.038725     |
| 0.009406     |      | 0.008486     | 0.008211     | 0.007844      | 7.412979    | 3.853721     |
| 4.745874     |      | 4.936714     |              |               |             |              |
| WH2          | 235  | WK01         | 0.073673     | 0.032972      | 0.040914    | 0.040241     |
| 0.009194     |      | 0.008156     | 0.007801     | 0.007503      | 8.012934    | 4.042751     |
| 5.244732     |      | 5.363341     |              |               |             |              |
| NB           | 191Y | GS136        | 0.088734     | 0.039361      | 0.043491    | 0.047677     |
| 0.010117     |      | 0.009221     | 0.009152     | 0.009073      | 8.770480    | 4.268656     |
| 4.751898     |      | 5.254864     |              |               |             |              |
| NB           | 191Y | HV74         | 0.092438     | 0.045474      | 0.054032    | 0.059700     |
| 0.009864     |      | 0.008474     | 0.008238     | 0.008054      | 9.371575    | 5.366351     |
| 6.559094     |      | 7.412622     |              |               |             |              |
| NB           | 191Y | VD-1838      | 0.086383     | 0.041175      | 0.046527    | 0.049499     |
| 0.010047     |      | 0.008470     | 0.008606     | 0.008211      | 8.598059    | 4.861264     |
| 5.406305     |      | 6.028347     |              |               |             |              |
| NB           | 191Y | WK01         | 0.087472     | 0.040426      | 0.051374    | 0.055084     |
| 0.009771     |      | 0.008294     | 0.008435     | 0.008073      | 8.952452    | 4.874164     |

|          |      |          |          |          |          |          |  |
|----------|------|----------|----------|----------|----------|----------|--|
| 6.090388 |      | 6.823626 |          |          |          |          |  |
| SB       | 191Y | GS136    | 0.088980 | 0.040795 | 0.052613 | 0.054809 |  |
| 0.010290 |      | 0.009322 | 0.009240 | 0.009212 | 8.647220 | 4.376057 |  |
| 5.693889 |      | 5.949671 |          |          |          |          |  |
| SB       | 191Y | HV74     | 0.094829 | 0.047020 | 0.064284 | 0.068209 |  |
| 0.010209 |      | 0.008834 | 0.008445 | 0.008156 | 9.288347 | 5.322736 |  |
| 7.611811 |      | 8.363568 |          |          |          |          |  |
| SB       | 191Y | VD-1838  | 0.088420 | 0.042986 | 0.056893 | 0.059112 |  |
| 0.010289 |      | 0.008642 | 0.008682 | 0.008193 | 8.593293 | 4.974042 |  |
| 6.552976 |      | 7.214625 |          |          |          |          |  |
| SB       | 191Y | WK01     | 0.091120 | 0.043250 | 0.060605 | 0.063187 |  |
| 0.010049 |      | 0.008554 | 0.008563 | 0.008138 | 9.067143 | 5.056207 |  |
| 7.077979 |      | 7.764697 |          |          |          |          |  |
| WH2      | 191Y | GS136    | 0.084732 | 0.036329 | 0.042529 | 0.047375 |  |
| 0.010620 |      | 0.009443 | 0.009591 | 0.009348 | 7.978538 | 3.847124 |  |
| 4.434371 |      | 5.068028 |          |          |          |          |  |
| WH2      | 191Y | HV74     | 0.092561 | 0.044359 | 0.056937 | 0.063144 |  |
| 0.010156 |      | 0.008817 | 0.008610 | 0.008277 | 9.113884 | 5.031083 |  |
| 6.613079 |      | 7.629173 |          |          |          |          |  |
| WH2      | 191Y | VD-1838  | 0.082784 | 0.039568 | 0.049957 | 0.053305 |  |
| 0.010090 |      | 0.008635 | 0.008793 | 0.008264 | 8.204551 | 4.582407 |  |
| 5.681646 |      | 6.450366 |          |          |          |          |  |
| WH2      | 191Y | WK01     | 0.087495 | 0.041243 | 0.055061 | 0.059804 |  |
| 0.009799 |      | 0.008413 | 0.008601 | 0.008094 | 8.928554 | 4.902391 |  |
| 6.401582 |      | 7.388685 |          |          |          |          |  |
| NB       | Adm1 | GS136    | 0.066457 | 0.037820 | 0.053780 | 0.053086 |  |
| 0.010344 |      | 0.008926 | 0.008846 | 0.008768 | 6.424960 | 4.237220 |  |
| 6.079386 |      | 6.054216 |          |          |          |          |  |
| NB       | Adm1 | HV74     | 0.064562 | 0.033163 | 0.043859 | 0.042316 |  |
| 0.009940 |      | 0.008291 | 0.008005 | 0.007824 | 6.494894 | 4.000030 |  |
| 5.478646 |      | 5.408763 |          |          |          |          |  |
| NB       | Adm1 | VD-1838  | 0.063597 | 0.035038 | 0.044281 | 0.040356 |  |
| 0.010137 |      | 0.008347 | 0.008244 | 0.007970 | 6.273540 | 4.197575 |  |
| 5.371281 |      | 5.063448 |          |          |          |          |  |
| NB       | Adm1 | WK01     | 0.061469 | 0.032505 | 0.044078 | 0.040795 |  |
| 0.009871 |      | 0.008187 | 0.007944 | 0.007813 | 6.227501 | 3.970159 |  |
| 5.548363 |      | 5.221356 |          |          |          |          |  |
| SB       | Adm1 | GS136    | 0.065200 | 0.035470 | 0.060448 | 0.057039 |  |
| 0.010506 |      | 0.009313 | 0.008975 | 0.008740 | 6.206075 | 3.808804 |  |
| 6.735392 |      | 6.525985 |          |          |          |          |  |
| SB       | Adm1 | HV74     | 0.066471 | 0.034932 | 0.053245 | 0.049689 |  |
| 0.010219 |      | 0.008698 | 0.008325 | 0.007976 | 6.504648 | 4.015877 |  |
| 6.395997 |      | 6.229909 |          |          |          |          |  |
| SB       | Adm1 | VD-1838  | 0.064384 | 0.037068 | 0.053479 | 0.048962 |  |
| 0.010545 |      | 0.008734 | 0.008584 | 0.008309 | 6.105790 | 4.244042 |  |
| 6.230273 |      | 5.892703 |          |          |          |          |  |
| SB       | Adm1 | WK01     | 0.060979 | 0.032875 | 0.050805 | 0.045831 |  |
| 0.010158 |      | 0.008474 | 0.008147 | 0.007917 | 6.003126 | 3.879433 |  |
| 6.235796 |      | 5.788871 |          |          |          |          |  |
| WH2      | Adm1 | GS136    | 0.059406 | 0.030870 | 0.049100 | 0.048573 |  |
| 0.010422 |      | 0.009215 | 0.009098 | 0.008816 | 5.700172 | 3.350194 |  |
| 5.396619 |      | 5.509719 |          |          |          |          |  |
| WH2      | Adm1 | HV74     | 0.063940 | 0.034384 | 0.045871 | 0.045047 |  |
| 0.010123 |      | 0.008778 | 0.008352 | 0.008088 | 6.316621 | 3.916887 |  |
| 5.492114 |      | 5.569829 |          |          |          |          |  |
| WH2      | Adm1 | VD-1838  | 0.059107 | 0.033403 | 0.045383 | 0.042385 |  |
| 0.010163 |      | 0.008727 | 0.008622 | 0.008239 | 5.816142 | 3.827638 |  |
| 5.263430 |      | 5.144182 |          |          |          |          |  |
| WH2      | Adm1 | WK01     | 0.059327 | 0.031444 | 0.044587 | 0.041886 |  |
| 0.009830 |      | 0.008349 | 0.008191 | 0.007901 | 6.035263 | 3.766373 |  |
| 5.443297 |      | 5.301397 |          |          |          |          |  |

|          |     |          |          |          |           |          |
|----------|-----|----------|----------|----------|-----------|----------|
| NB       | Ge  | GS136    | 0.098355 | 0.061163 | 0.060619  | 0.055240 |
| 0.009750 |     | 0.008698 | 0.008608 | 0.008311 | 10.087633 | 7.031437 |
| 7.042428 |     | 6.646820 |          |          |           |          |
| NB       | Ge  | HV74     | 0.105036 | 0.066017 | 0.066462  | 0.065591 |
| 0.009401 |     | 0.008147 | 0.007776 | 0.007605 | 11.173280 | 8.102827 |
| 8.546667 |     | 8.624700 |          |          |           |          |
| NB       | Ge  | VD-1838  | 0.098546 | 0.059234 | 0.060309  | 0.057680 |
| 0.009502 |     | 0.008265 | 0.008096 | 0.007718 | 10.371344 | 7.166920 |
| 7.449545 |     | 7.473675 |          |          |           |          |
| NB       | Ge  | WK01     | 0.097711 | 0.058411 | 0.062432  | 0.059964 |
| 0.009192 |     | 0.007978 | 0.007876 | 0.007546 | 10.630164 | 7.321368 |
| 7.926955 |     | 7.946771 |          |          |           |          |
| SB       | Ge  | GS136    | 0.099590 | 0.061673 | 0.070290  | 0.064345 |
| 0.009969 |     | 0.008787 | 0.008713 | 0.008459 | 9.990134  | 7.018945 |
| 8.067355 |     | 7.606425 |          |          |           |          |
| SB       | Ge  | HV74     | 0.107410 | 0.066188 | 0.076159  | 0.074008 |
| 0.009563 |     | 0.008207 | 0.007900 | 0.007684 | 11.231424 | 8.064942 |
| 9.640643 |     | 9.630855 |          |          |           |          |
| SB       | Ge  | VD-1838  | 0.100721 | 0.061722 | 0.069779  | 0.068069 |
| 0.009660 |     | 0.008468 | 0.008251 | 0.007872 | 10.426082 | 7.289146 |
| 8.456738 |     | 8.647403 |          |          |           |          |
| SB       | Ge  | WK01     | 0.101391 | 0.061330 | 0.072687  | 0.069455 |
| 0.009421 |     | 0.008125 | 0.007932 | 0.007627 | 10.762678 | 7.548205 |
| 9.163576 |     | 9.106831 |          |          |           |          |
| WH2      | Ge  | GS136    | 0.095063 | 0.057037 | 0.062222  | 0.056929 |
| 0.010148 |     | 0.008892 | 0.008924 | 0.008570 | 9.367615  | 6.414111 |
| 6.972765 |     | 6.643023 |          |          |           |          |
| WH2      | Ge  | HV74     | 0.107578 | 0.066193 | 0.072482  | 0.071765 |
| 0.009542 |     | 0.008492 | 0.008089 | 0.007842 | 11.274096 | 7.794928 |
| 8.960906 |     | 9.151309 |          |          |           |          |
| WH2      | Ge  | VD-1838  | 0.095640 | 0.057827 | 0.063897  | 0.061986 |
| 0.009524 |     | 0.008472 | 0.008299 | 0.007846 | 10.041667 | 6.825508 |
| 7.699032 |     | 7.900652 |          |          |           |          |
| WH2      | Ge  | WK01     | 0.097899 | 0.057409 | 0.065652  | 0.063784 |
| 0.009202 |     | 0.008208 | 0.008059 | 0.007715 | 10.639165 | 6.994157 |
| 8.146881 |     | 8.267423 |          |          |           |          |
| NB       | Den | GS136    | 0.067592 | 0.036098 | 0.041672  | 0.041709 |
| 0.010087 |     | 0.008764 | 0.008825 | 0.008619 | 6.700788  | 4.118778 |
| 4.722031 |     | 4.839167 |          |          |           |          |
| NB       | Den | HV74     | 0.068550 | 0.038139 | 0.039050  | 0.036493 |
| 0.009529 |     | 0.008444 | 0.008054 | 0.007925 | 7.194131  | 4.516587 |
| 4.848665 |     | 4.604693 |          |          |           |          |
| NB       | Den | VD-1838  | 0.061927 | 0.034252 | 0.033057  | 0.029691 |
| 0.009719 |     | 0.008444 | 0.008268 | 0.007987 | 6.371892  | 4.056212 |
| 3.998160 |     | 3.717446 |          |          |           |          |
| NB       | Den | WK01     | 0.060292 | 0.030934 | 0.034014  | 0.031414 |
| 0.009558 |     | 0.008215 | 0.008009 | 0.007804 | 6.307906  | 3.765809 |
| 4.246759 |     | 4.025317 |          |          |           |          |
| SB       | Den | GS136    | 0.067871 | 0.035893 | 0.051939  | 0.049423 |
| 0.010292 |     | 0.009069 | 0.009006 | 0.008690 | 6.594283  | 3.957689 |
| 5.766980 |     | 5.687060 |          |          |           |          |
| SB       | Den | HV74     | 0.068930 | 0.037384 | 0.047018  | 0.043346 |
| 0.009574 |     | 0.008734 | 0.008176 | 0.007928 | 7.199657  | 4.280361 |
| 5.750653 |     | 5.467775 |          |          |           |          |
| SB       | Den | VD-1838  | 0.064517 | 0.036004 | 0.042708  | 0.039135 |
| 0.009978 |     | 0.008776 | 0.008426 | 0.008117 | 6.465972  | 4.102338 |
| 5.068831 |     | 4.821128 |          |          |           |          |
| SB       | Den | WK01     | 0.061464 | 0.031783 | 0.040758  | 0.038035 |
| 0.009594 |     | 0.008530 | 0.008045 | 0.007756 | 6.406228  | 3.725955 |
| 5.066292 |     | 4.904271 |          |          |           |          |
| WH2      | Den | GS136    | 0.064240 | 0.030988 | 0.038449  | 0.039361 |

|          |       |           |           |          |          |          |          |           |           |          |
|----------|-------|-----------|-----------|----------|----------|----------|----------|-----------|-----------|----------|
| 0.010419 |       | 0.009084  |           | 0.009306 |          | 0.008956 |          | 6.165763  |           | 3.411156 |
| 4.131575 |       | 4.394871  |           |          |          |          |          |           |           |          |
| WH2      | Den   | HV74      | 0.069053  |          | 0.036368 |          | 0.041590 |           | 0.041233  |          |
| 0.009698 |       | 0.008851  |           | 0.008387 |          | 0.008133 |          | 7.120015  |           | 4.108868 |
| 4.959084 |       | 5.070060  |           |          |          |          |          |           |           |          |
| WH2      | Den   | VD-1838   | 0.060222  |          | 0.032029 |          | 0.036381 |           | 0.034643  |          |
| 0.009789 |       | 0.008800  |           | 0.008583 |          | 0.008216 |          | 6.151775  |           | 3.639547 |
| 4.238620 |       | 4.216597  |           |          |          |          |          |           |           |          |
| WH2      | Den   | WK01      | 0.059150  |          | 0.029050 |          | 0.034216 |           | 0.033960  |          |
| 0.009405 |       | 0.008388  |           | 0.008254 |          | 0.007893 |          | 6.289311  |           | 3.463166 |
| 4.145265 |       | 4.302343  |           |          |          |          |          |           |           |          |
| NB       | LS039 | GS136     | 0.085931  |          | 0.046342 |          | 0.053552 |           | 0.055186  |          |
| 0.010276 |       | 0.009118  |           | 0.009056 |          | 0.008893 |          | 8.362065  |           | 5.082281 |
| 5.913132 |       | 6.205777  |           |          |          |          |          |           |           |          |
| NB       | LS039 | HV74      | 0.092653  |          | 0.048985 |          | 0.061537 |           | 0.061937  |          |
| 0.009750 |       | 0.008734  |           | 0.008550 |          | 0.008403 |          | 9.503183  |           | 5.608765 |
| 7.197200 |       | 7.371092  |           |          |          |          |          |           |           |          |
| NB       | LS039 | VD-1838   | 0.087699  |          | 0.047933 |          | 0.059019 |           | 0.056901  |          |
| 0.009946 |       | 0.008728  |           | 0.008579 |          | 0.008265 |          | 8.817764  |           | 5.491757 |
| 6.879251 |       | 6.884757  |           |          |          |          |          |           |           |          |
| NB       | LS039 | WK01      | 0.089319  |          | 0.046968 |          | 0.059798 |           | 0.059038  |          |
| 0.009790 |       | 0.008456  |           | 0.008366 |          | 0.008101 |          | 9.123472  |           | 5.554166 |
| 7.147702 |       | 7.287515  |           |          |          |          |          |           |           |          |
| SB       | LS039 | GS136     | 0.087926  |          | 0.048026 |          | 0.063185 |           | 0.065325  |          |
| 0.010549 |       | 0.009308  |           | 0.009079 |          | 0.009001 |          | 8.335377  |           | 5.159876 |
| 6.959295 |       | 7.257712  |           |          |          |          |          |           |           |          |
| SB       | LS039 | HV74      | 0.093070  |          | 0.048383 |          | 0.069209 |           | 0.069275  |          |
| 0.009951 |       | 0.008883  |           | 0.008550 |          | 0.008402 |          | 9.352644  |           | 5.446379 |
| 8.094635 |       | 8.245122  |           |          |          |          |          |           |           |          |
| SB       | LS039 | VD-1838   | 0.089820  |          | 0.048616 |          | 0.067023 |           | 0.064694  |          |
| 0.010191 |       | 0.008817  |           | 0.008617 |          | 0.008395 |          | 8.813963  |           | 5.513676 |
| 7.777993 |       | 7.706641  |           |          |          |          |          |           |           |          |
| SB       | LS039 | WK01      | 0.091940  |          | 0.047727 |          | 0.066435 |           | 0.066423  |          |
| 0.010033 |       | 0.008536  |           | 0.008395 |          | 0.008248 |          | 9.163614  |           | 5.591256 |
| 7.913450 |       | 8.053431  |           |          |          |          |          |           |           |          |
| WH2      | LS039 | GS136     | 0.083787  |          | 0.043387 |          | 0.051798 |           | 0.056393  |          |
| 0.010490 |       | 0.009257  |           | 0.009411 |          | 0.009143 |          | 7.987593  |           | 4.686822 |
| 5.503966 |       | 6.167850  |           |          |          |          |          |           |           |          |
| WH2      | LS039 | HV74      | 0.093135  |          | 0.047830 |          | 0.063968 |           | 0.066765  |          |
| 0.009861 |       | 0.008927  |           | 0.008762 |          | 0.008493 |          | 9.444406  |           | 5.357921 |
| 7.300356 |       | 7.860847  |           |          |          |          |          |           |           |          |
| WH2      | LS039 | VD-1838   | 0.086464  |          | 0.046307 |          | 0.061601 |           | 0.060952  |          |
| 0.010011 |       | 0.008891  |           | 0.008852 |          | 0.008537 |          | 8.637263  |           | 5.208414 |
| 6.958756 |       | 7.139473  |           |          |          |          |          |           |           |          |
| WH2      | LS039 | WK01      | 0.089596  |          | 0.044066 |          | 0.061409 |           | 0.062656  |          |
| 0.009714 |       | 0.008510  |           | 0.008577 |          | 0.008261 |          | 9.222887  |           | 5.178024 |
| 7.159598 |       | 7.584343  |           |          |          |          |          |           |           |          |
| SB       | NB    | GS136     | 0.017732  |          | 0.028670 |          | 0.018396 |           | -0.013822 |          |
| 0.035546 |       | 0.036138  |           | 0.035884 |          | 0.032170 |          | 0.498839  |           | 0.793355 |
| 0.512651 |       | -0.429661 |           |          |          |          |          |           |           |          |
| SB       | NB    | HV74      | 0.034219  |          | 0.033542 |          | 0.025133 |           | 0.001213  |          |
| 0.032835 |       | 0.031004  |           | 0.030893 |          | 0.026756 |          | 1.042144  |           | 1.081842 |
| 0.813569 |       | 0.045339  |           |          |          |          |          |           |           |          |
| SB       | NB    | VD-1838   | 0.029034  |          | 0.020447 |          | 0.008822 |           | -0.007414 |          |
| 0.033245 |       | 0.030464  |           | 0.030734 |          | 0.028363 |          | 0.873319  |           | 0.671179 |
| 0.287046 |       | -0.261390 |           |          |          |          |          |           |           |          |
| SB       | NB    | WK01      | 0.018303  |          | 0.018759 |          | 0.011206 |           | -0.004669 |          |
| 0.032733 |       | 0.030216  |           | 0.029121 |          | 0.027446 |          | 0.559162  |           | 0.620833 |
| 0.384794 |       | -0.170102 |           |          |          |          |          |           |           |          |
| WH2      | NB    | GS136     | -0.009530 |          | 0.011107 |          | 0.009312 |           | -0.006743 |          |
| 0.033654 |       | 0.034211  |           | 0.035552 |          | 0.030240 |          | -0.283182 |           | 0.324669 |

|           |     |           |           |           |           |           |  |
|-----------|-----|-----------|-----------|-----------|-----------|-----------|--|
| 0.261933  |     |           | -0.222981 |           |           |           |  |
| WH2       | NB  | HV74      | 0.005725  | 0.016548  | 0.030471  | 0.030071  |  |
| 0.030886  |     | 0.031223  | 0.028923  | 0.025422  | 0.185349  | 0.530010  |  |
| 1.053535  |     | 1.182858  |           |           |           |           |  |
| WH2       | NB  | VD-1838   | -0.005261 | 0.011323  | 0.015449  | 0.029987  |  |
| 0.031888  |     | 0.030242  | 0.029970  | 0.027724  | -0.164972 | 0.374400  |  |
| 0.515491  |     | 1.081624  |           |           |           |           |  |
| WH2       | NB  | WK01      | 0.009781  | 0.009762  | 0.013548  | 0.019224  |  |
| 0.028990  |     | 0.028797  | 0.027301  | 0.025419  | 0.337414  | 0.339006  |  |
| 0.496225  |     | 0.756279  |           |           |           |           |  |
| NB        | SB  | GS136     | -0.017732 | -0.028670 | -0.018396 | 0.013822  |  |
| 0.035546  |     | 0.036138  | 0.035884  | 0.032170  | -0.498839 | -0.793355 |  |
| -0.512651 |     | 0.429661  |           |           |           |           |  |
| NB        | SB  | HV74      | -0.034219 | -0.033542 | -0.025133 | -0.001213 |  |
| 0.032835  |     | 0.031004  | 0.030893  | 0.026756  | -1.042144 | -1.081842 |  |
| -0.813569 |     | -0.045339 |           |           |           |           |  |
| NB        | SB  | VD-1838   | -0.029034 | -0.020447 | -0.008822 | 0.007414  |  |
| 0.033245  |     | 0.030464  | 0.030734  | 0.028363  | -0.873319 | -0.671179 |  |
| -0.287046 |     | 0.261390  |           |           |           |           |  |
| NB        | SB  | WK01      | -0.018303 | -0.018759 | -0.011206 | 0.004669  |  |
| 0.032733  |     | 0.030216  | 0.029121  | 0.027446  | -0.559162 | -0.620833 |  |
| -0.384794 |     | 0.170102  |           |           |           |           |  |
| WH2       | SB  | GS136     | -0.018453 | -0.035950 | 0.006235  | 0.017477  |  |
| 0.037688  |     | 0.035398  | 0.036153  | 0.031037  | -0.489624 | -1.015598 |  |
| 0.172472  |     | 0.563096  |           |           |           |           |  |
| WH2       | SB  | HV74      | -0.038583 | -0.038511 | -0.004025 | 0.018511  |  |
| 0.036382  |     | 0.030530  | 0.030047  | 0.027797  | -1.060491 | -1.261389 |  |
| -0.133946 |     | 0.665929  |           |           |           |           |  |
| WH2       | SB  | VD-1838   | -0.051073 | -0.031283 | 0.000828  | 0.019788  |  |
| 0.037522  |     | 0.031512  | 0.031159  | 0.028845  | -1.361141 | -0.992712 |  |
| 0.026560  |     | 0.686022  |           |           |           |           |  |
| WH2       | SB  | WK01      | -0.015565 | -0.025850 | -0.003080 | 0.026489  |  |
| 0.035089  |     | 0.029551  | 0.028300  | 0.026722  | -0.443587 | -0.874779 |  |
| -0.108830 |     | 0.991267  |           |           |           |           |  |
| NB        | Swe | GS136     | 0.086463  | 0.046836  | 0.057021  | 0.055066  |  |
| 0.010198  |     | 0.009037  | 0.009268  | 0.008946  | 8.478669  | 5.182743  |  |
| 6.152450  |     | 6.155426  |           |           |           |           |  |
| NB        | Swe | HV74      | 0.093088  | 0.051214  | 0.063639  | 0.062952  |  |
| 0.009657  |     | 0.008357  | 0.008365  | 0.008065  | 9.639865  | 6.127943  |  |
| 7.607967  |     | 7.805297  |           |           |           |           |  |
| NB        | Swe | VD-1838   | 0.084885  | 0.045454  | 0.057631  | 0.057515  |  |
| 0.009920  |     | 0.008760  | 0.008661  | 0.008254  | 8.557281  | 5.188560  |  |
| 6.654343  |     | 6.968381  |           |           |           |           |  |
| NB        | Swe | WK01      | 0.086215  | 0.045910  | 0.060921  | 0.059443  |  |
| 0.009792  |     | 0.008504  | 0.008373  | 0.008006  | 8.804921  | 5.398624  |  |
| 7.275537  |     | 7.425293  |           |           |           |           |  |
| SB        | Swe | GS136     | 0.088129  | 0.049510  | 0.064879  | 0.061159  |  |
| 0.010306  |     | 0.009408  | 0.009251  | 0.009016  | 8.550868  | 5.262610  |  |
| 7.012986  |     | 6.783278  |           |           |           |           |  |
| SB        | Swe | HV74      | 0.093424  | 0.049351  | 0.069941  | 0.067822  |  |
| 0.009746  |     | 0.008503  | 0.008452  | 0.008021  | 9.585754  | 5.803803  |  |
| 8.274696  |     | 8.455151  |           |           |           |           |  |
| SB        | Swe | VD-1838   | 0.087001  | 0.045552  | 0.063851  | 0.065060  |  |
| 0.009924  |     | 0.009007  | 0.008781  | 0.008337  | 8.766854  | 5.057159  |  |
| 7.271571  |     | 7.803927  |           |           |           |           |  |
| SB        | Swe | WK01      | 0.088725  | 0.046271  | 0.066629  | 0.065183  |  |
| 0.009730  |     | 0.008626  | 0.008514  | 0.008196  | 9.118635  | 5.363866  |  |
| 7.826078  |     | 7.953060  |           |           |           |           |  |
| WH2       | Swe | GS136     | 0.080509  | 0.044752  | 0.056585  | 0.055664  |  |
| 0.010351  |     | 0.009293  | 0.009445  | 0.009034  | 7.777599  | 4.815660  |  |
| 5.990941  |     | 6.161455  |           |           |           |           |  |

|           |     |            |           |           |           |           |
|-----------|-----|------------|-----------|-----------|-----------|-----------|
| WH2       | Swe | HV74       | 0.091211  | 0.050593  | 0.066338  | 0.067846  |
| 0.009719  |     | 0.008555   | 0.008563  | 0.008065  | 9.384625  | 5.913880  |
| 7.747205  |     | 8.412068   |           |           |           |           |
| WH2       | Swe | VD-1838    | 0.081367  | 0.044636  | 0.058748  | 0.061920  |
| 0.009896  |     | 0.009010   | 0.008857  | 0.008378  | 8.222564  | 4.953840  |
| 6.632761  |     | 7.391121   |           |           |           |           |
| WH2       | Swe | WK01       | 0.084309  | 0.046060  | 0.063069  | 0.063453  |
| 0.009592  |     | 0.008588   | 0.008480  | 0.008052  | 8.789498  | 5.363498  |
| 7.437476  |     | 7.880790   |           |           |           |           |
| NB        | Uap | GS136      | 0.119758  | 0.064678  | -0.046880 | -0.124372 |
| 0.010874  |     | 0.009517   | 0.009726  | 0.009233  | 11.013343 | 6.796083  |
| -4.820198 |     | -13.469740 |           |           |           |           |
| NB        | Uap | HV74       | 0.126114  | 0.073569  | -0.026906 | -0.094680 |
| 0.009521  |     | 0.008473   | 0.008226  | 0.007778  | 13.245301 | 8.682512  |
| -3.270856 |     | -12.172289 |           |           |           |           |
| NB        | Uap | VD-1838    | 0.126515  | 0.079798  | -0.016418 | -0.084392 |
| 0.009733  |     | 0.008651   | 0.008608  | 0.007995  | 12.998838 | 9.223910  |
| -1.907266 |     | -10.555070 |           |           |           |           |
| NB        | Uap | WK01       | 0.124246  | 0.070842  | -0.023773 | -0.094237 |
| 0.009324  |     | 0.008428   | 0.008232  | 0.007628  | 13.324983 | 8.405142  |
| -2.888033 |     | -12.353368 |           |           |           |           |
| SB        | Uap | GS136      | 0.119215  | 0.065484  | -0.039507 | -0.115705 |
| 0.010879  |     | 0.009766   | 0.009788  | 0.009116  | 10.958293 | 6.705364  |
| -4.036467 |     | -12.692895 |           |           |           |           |
| SB        | Uap | HV74       | 0.123960  | 0.073048  | -0.022397 | -0.087837 |
| 0.009758  |     | 0.008568   | 0.008374  | 0.008006  | 12.704024 | 8.525553  |
| -2.674672 |     | -10.971571 |           |           |           |           |
| SB        | Uap | VD-1838    | 0.128105  | 0.080572  | -0.009413 | -0.074481 |
| 0.009971  |     | 0.008826   | 0.008925  | 0.008404  | 12.847560 | 9.129439  |
| -1.054635 |     | -8.862443  |           |           |           |           |
| SB        | Uap | WK01       | 0.125368  | 0.071199  | -0.019524 | -0.087292 |
| 0.009565  |     | 0.008480   | 0.008458  | 0.007757  | 13.106576 | 8.395874  |
| -2.308375 |     | -11.253850 |           |           |           |           |
| WH2       | Uap | GS136      | 0.113485  | 0.057704  | -0.052416 | -0.131260 |
| 0.011155  |     | 0.009933   | 0.009931  | 0.009220  | 10.173951 | 5.809149  |
| -5.278210 |     | -14.235867 |           |           |           |           |
| WH2       | Uap | HV74       | 0.123325  | 0.074790  | -0.025377 | -0.091759 |
| 0.009659  |     | 0.008696   | 0.008518  | 0.007906  | 12.767812 | 8.600927  |
| -2.979136 |     | -11.606074 |           |           |           |           |
| WH2       | Uap | VD-1838    | 0.122248  | 0.078085  | -0.016285 | -0.082160 |
| 0.009885  |     | 0.008987   | 0.008969  | 0.008270  | 12.366771 | 8.688546  |
| -1.815774 |     | -9.934881  |           |           |           |           |
| WH2       | Uap | WK01       | 0.120394  | 0.070701  | -0.024271 | -0.092778 |
| 0.009413  |     | 0.008560   | 0.008440  | 0.007659  | 12.789468 | 8.259670  |
| -2.875834 |     | -12.114103 |           |           |           |           |
| NB        | WH2 | GS136      | 0.009530  | -0.011107 | -0.009312 | 0.006743  |
| 0.033654  |     | 0.034211   | 0.035552  | 0.030240  | 0.283182  | -0.324669 |
| -0.261933 |     | 0.222981   |           |           |           |           |
| NB        | WH2 | HV74       | -0.005725 | -0.016548 | -0.030471 | -0.030071 |
| 0.030886  |     | 0.031223   | 0.028923  | 0.025422  | -0.185349 | -0.530010 |
| -1.053535 |     | -1.182858  |           |           |           |           |
| NB        | WH2 | VD-1838    | 0.005261  | -0.011323 | -0.015449 | -0.029987 |
| 0.031888  |     | 0.030242   | 0.029970  | 0.027724  | 0.164972  | -0.374400 |
| -0.515491 |     | -1.081624  |           |           |           |           |
| NB        | WH2 | WK01       | -0.009781 | -0.009762 | -0.013548 | -0.019224 |
| 0.028990  |     | 0.028797   | 0.027301  | 0.025419  | -0.337414 | -0.339006 |
| -0.496225 |     | -0.756279  |           |           |           |           |
| SB        | WH2 | GS136      | 0.018453  | 0.035950  | -0.006235 | -0.017477 |
| 0.037688  |     | 0.035398   | 0.036153  | 0.031037  | 0.489624  | 1.015598  |
| -0.172472 |     | -0.563096  |           |           |           |           |
| SB        | WH2 | HV74       | 0.038583  | 0.038511  | 0.004025  | -0.018511 |

```
0.036382      0.030530      0.030047      0.027797      1.060491      1.261389
0.133946      -0.665929
SB      WH2      VD-1838 0.051073      0.031283      -0.000828      -0.019788
0.037522      0.031512      0.031159      0.028845      1.361141      0.992712
-0.026560      -0.686022
SB      WH2      WK01      0.015565      0.025850      0.003080      -0.026489
0.035089      0.029551      0.028300      0.026722      0.443587      0.874779
0.108830      -0.991267
```

```
</pre></body></html>
```
