# Supplementary material
Source: PubMed Central journal article supplement (PMC6590514)
Supplement: NIHMS1017233-supplement-Supplemental_data_2.pdf [file NIHMS1017233-supplement-Supplemental_data_2.pdf]

<html><head></head><body><pre style="word-wrap: break-word; white-space: pre-wrap;">#  
 Barlow et al. Supplementary Data 2: D-statistic tests for unequal allele sharing between  
 two cave bears and a polar bear or brown bear candidate introgressor.  
 # Positive values are consistent with admixture between the P2 and P3 individuals, and  
 negative values between P1 and P3 individuals.  
 # D values, weighted block jackknife standard error, and Zscore, calculated using 4  
 alternative outgroups are presented in adjacent columns with prefix "D", "SE" and "Z",  
 respectively.  
 # Outgroups are indicated by their latin name

| P1           | P2           | P3           | Damericanus | Dthibetanus   | Dornatus    | Dmelanoleuca |
|--------------|--------------|--------------|-------------|---------------|-------------|--------------|
| SEamericanus | SEthibetanus | SEornatus    | SEornatus   | SEmelanoleuca | Zamericanus |              |
| Zthibetanus  | Zornatus     | Zmelanoleuca |             |               |             |              |
| HV74         | GS136        | 235          | 0.033283    | 0.037460      | 0.056138    | 0.052017     |
| 0.011660     |              | 0.010916     | 0.009605    | 0.008682      | 2.854552    | 3.431746     |
| 5.844397     |              | 5.991686     |             |               |             |              |
| HV74         | UD1838       | 235          | 0.030220    | 0.021658      | 0.015440    | -0.030720    |
| 0.009700     |              | 0.009117     | 0.008063    | 0.007067      | 3.115564    | 2.375668     |
| 1.914810     |              | -4.347214    |             |               |             |              |
| UD1838       | GS136        | 235          | -0.016285   | 0.009043      | 0.049044    | 0.147689     |
| 0.019283     |              | 0.019143     | 0.016431    | 0.012653      | -0.844511   | 0.472402     |
| 2.984898     |              | 11.672353    |             |               |             |              |
| WK01         | GS136        | 235          | 0.017068    | 0.018617      | 0.087477    | 0.187196     |
| 0.016785     |              | 0.015476     | 0.013618    | 0.010977      | 1.016816    | 1.202997     |
| 6.423513     |              | 17.052740    |             |               |             |              |
| WK01         | HV74         | 235          | -0.030410   | -0.031856     | -0.020989   | 0.023423     |
| 0.009353     |              | 0.008806     | 0.007751    | 0.006776      | -3.251359   | -3.617747    |
| -2.707899    |              | 3.456470     |             |               |             |              |
| WK01         | UD1838       | 235          | 0.013749    | 0.002853      | 0.024918    | 0.008086     |
| 0.013741     |              | 0.013243     | 0.011267    | 0.008529      | 1.000560    | 0.215420     |
| 2.211554     |              | 0.948037     |             |               |             |              |
| HV74         | GS136        | 191Y         | 0.019506    | 0.022479      | 0.045072    | 0.046113     |
| 0.012172     |              | 0.011544     | 0.010197    | 0.009199      | 1.602527    | 1.947224     |
| 4.420070     |              | 5.013092     |             |               |             |              |
| HV74         | UD1838       | 191Y         | 0.024079    | 0.013844      | 0.008692    | -0.034663    |
| 0.009960     |              | 0.009603     | 0.008415    | 0.007259      | 2.417573    | 1.441738     |
| 1.032978     |              | -4.774910    |             |               |             |              |
| UD1838       | GS136        | 191Y         | -0.006808   | 0.023203      | 0.055346    | 0.161072     |
| 0.021029     |              | 0.020090     | 0.017747    | 0.013610      | -0.323764   | 1.154934     |
| 3.118588     |              | 11.834949    |             |               |             |              |
| WK01         | GS136        | 191Y         | 0.002707    | 0.012125      | 0.074273    | 0.174536     |
| 0.017364     |              | 0.016465     | 0.014805    | 0.011564      | 0.155903    | 0.736422     |
| 5.016895     |              | 15.093062    |             |               |             |              |
| WK01         | HV74         | 191Y         | -0.031201   | -0.025672     | -0.020676   | 0.023150     |
| 0.009893     |              | 0.009193     | 0.008243    | 0.007185      | -3.153876   | -2.792517    |
| -2.508215    |              | 3.221917     |             |               |             |              |
| WK01         | UD1838       | 191Y         | -0.002389   | -0.004823     | 0.015299    | 0.004789     |
| 0.014267     |              | 0.013949     | 0.011704    | 0.008840      | -0.167420   | -0.345785    |
| 1.307161     |              | 0.541762     |             |               |             |              |
| HV74         | GS136        | Adm1         | 0.039809    | 0.038534      | 0.055868    | 0.051484     |
| 0.011513     |              | 0.010976     | 0.009713    | 0.008734      | 3.457881    | 3.510701     |
| 5.751796     |              | 5.894429     |             |               |             |              |
| HV74         | UD1838       | Adm1         | 0.033587    | 0.024945      | 0.016185    | -0.029294    |
| 0.009691     |              | 0.009267     | 0.008157    | 0.007074      | 3.465838    | 2.691840     |
| 1.984149     |              | -4.141097    |             |               |             |              |
| UD1838       | GS136        | Adm1         | 0.008662    | 0.025733      | 0.059340    | 0.163073     |
| 0.019950     |              | 0.019029     | 0.016502    | 0.012475      | 0.434164    | 1.352309     |
| 3.596013     |              | 13.072068    |             |               |             |              |
| WK01         | GS136        | Adm1         | 0.021076    | 0.026252      | 0.086943    | 0.189162     |
| 0.016913     |              | 0.015379     | 0.013642    | 0.010622      | 1.246137    | 1.706944     |

|           |        |           |           |           |           |           |  |
|-----------|--------|-----------|-----------|-----------|-----------|-----------|--|
| 6.373256  |        | 17.808323 |           |           |           |           |  |
| WK01      | HV74   | Adm1      | -0.034839 | -0.030997 | -0.021607 | 0.023500  |  |
| 0.009633  |        | 0.008984  | 0.007976  | 0.006994  | -3.616482 | -3.450264 |  |
| -2.708862 |        | 3.360206  |           |           |           |           |  |
| WK01      | UD1838 | Adm1      | 0.003153  | 0.001809  | 0.021826  | 0.006583  |  |
| 0.014240  |        | 0.013164  | 0.011101  | 0.008549  | 0.221451  | 0.137409  |  |
| 1.966098  |        | 0.770053  |           |           |           |           |  |
| HV74      | GS136  | Cau       | 0.019694  | 0.018767  | 0.045583  | 0.042446  |  |
| 0.011548  |        | 0.010837  | 0.009732  | 0.008582  | 1.705417  | 1.731779  |  |
| 4.683809  |        | 4.945737  |           |           |           |           |  |
| HV74      | UD1838 | Cau       | 0.026332  | 0.015757  | 0.010368  | -0.035602 |  |
| 0.009660  |        | 0.009183  | 0.008221  | 0.007048  | 2.726032  | 1.715962  |  |
| 1.261223  |        | -5.051444 |           |           |           |           |  |
| UD1838    | GS136  | Cau       | -0.015094 | 0.007249  | 0.044683  | 0.151460  |  |
| 0.019882  |        | 0.018035  | 0.016344  | 0.012420  | -0.759180 | 0.401972  |  |
| 2.733900  |        | 12.194788 |           |           |           |           |  |
| WK01      | GS136  | Cau       | 0.014276  | 0.014766  | 0.084356  | 0.186114  |  |
| 0.017008  |        | 0.015245  | 0.013218  | 0.010486  | 0.839334  | 0.968571  |  |
| 6.381651  |        | 17.748181 |           |           |           |           |  |
| WK01      | HV74   | Cau       | -0.029504 | -0.025383 | -0.018493 | 0.026595  |  |
| 0.009558  |        | 0.008963  | 0.008115  | 0.007051  | -3.086941 | -2.831836 |  |
| -2.278913 |        | 3.771739  |           |           |           |           |  |
| WK01      | UD1838 | Cau       | 0.013973  | 0.006916  | 0.025954  | 0.008519  |  |
| 0.013840  |        | 0.012773  | 0.010736  | 0.008255  | 1.009630  | 0.541440  |  |
| 2.417534  |        | 1.032053  |           |           |           |           |  |
| HV74      | GS136  | Den       | 0.033851  | 0.031336  | 0.053389  | 0.049505  |  |
| 0.011786  |        | 0.011034  | 0.009655  | 0.008747  | 2.872059  | 2.839892  |  |
| 5.529542  |        | 5.659943  |           |           |           |           |  |
| HV74      | UD1838 | Den       | 0.030484  | 0.021318  | 0.012931  | -0.032483 |  |
| 0.009932  |        | 0.009348  | 0.008260  | 0.007059  | 3.069396  | 2.280427  |  |
| 1.565421  |        | -4.601591 |           |           |           |           |  |
| UD1838    | GS136  | Den       | -0.010763 | 0.010524  | 0.054069  | 0.159618  |  |
| 0.019754  |        | 0.019244  | 0.017006  | 0.012828  | -0.544860 | 0.546881  |  |
| 3.179400  |        | 12.443098 |           |           |           |           |  |
| WK01      | GS136  | Den       | 0.016136  | 0.020408  | 0.087515  | 0.190578  |  |
| 0.016878  |        | 0.015560  | 0.013813  | 0.010917  | 0.956008  | 1.311559  |  |
| 6.335606  |        | 17.457005 |           |           |           |           |  |
| WK01      | HV74   | Den       | -0.029965 | -0.028596 | -0.018607 | 0.026753  |  |
| 0.009687  |        | 0.008979  | 0.007952  | 0.006900  | -3.093391 | -3.184572 |  |
| -2.340104 |        | 3.877369  |           |           |           |           |  |
| WK01      | UD1838 | Den       | 0.004792  | 0.002459  | 0.018936  | 0.005570  |  |
| 0.014084  |        | 0.013011  | 0.011288  | 0.008613  | 0.340287  | 0.188968  |  |
| 1.677517  |        | 0.646675  |           |           |           |           |  |
| HV74      | GS136  | LS039     | 0.033518  | 0.035235  | 0.058225  | 0.055768  |  |
| 0.012192  |        | 0.012040  | 0.010516  | 0.009361  | 2.749330  | 2.926505  |  |
| 5.536918  |        | 5.957539  |           |           |           |           |  |
| HV74      | UD1838 | LS039     | 0.027805  | 0.020684  | 0.012677  | -0.032104 |  |
| 0.010274  |        | 0.009878  | 0.008714  | 0.007528  | 2.706482  | 2.093969  |  |
| 1.454817  |        | -4.264316 |           |           |           |           |  |
| UD1838    | GS136  | LS039     | -0.008287 | 0.013058  | 0.052267  | 0.156769  |  |
| 0.020961  |        | 0.020112  | 0.017764  | 0.013583  | -0.395370 | 0.649284  |  |
| 2.942268  |        | 11.541320 |           |           |           |           |  |
| WK01      | GS136  | LS039     | 0.011331  | 0.021472  | 0.077805  | 0.182708  |  |
| 0.017204  |        | 0.016015  | 0.014993  | 0.011752  | 0.658623  | 1.340745  |  |
| 5.189339  |        | 15.546867 |           |           |           |           |  |
| WK01      | HV74   | LS039     | -0.033538 | -0.026784 | -0.022500 | 0.021249  |  |
| 0.010208  |        | 0.009478  | 0.008289  | 0.007272  | -3.285572 | -2.825881 |  |
| -2.714444 |        | 2.921978  |           |           |           |           |  |
| WK01      | UD1838 | LS039     | -0.000267 | 0.004913  | 0.018626  | 0.005411  |  |
| 0.014807  |        | 0.013681  | 0.012179  | 0.008931  | -0.017999 | 0.359093  |  |
| 1.529294  |        | 0.605829  |           |           |           |           |  |

|           |        |     |           |           |           |           |
|-----------|--------|-----|-----------|-----------|-----------|-----------|
| HV74      | GS136  | NB  | 0.032854  | 0.030289  | 0.051452  | 0.051070  |
| 0.012427  |        |     | 0.011265  | 0.010277  | 0.009167  | 2.643716  |
| 5.006415  |        |     | 5.570844  |           |           | 2.688703  |
| HV74      | UD1838 | NB  | 0.039461  | 0.027350  | 0.020208  | -0.025494 |
| 0.010343  |        |     | 0.010106  | 0.008982  | 0.007835  | 3.815218  |
| 2.249876  |        |     | -3.253925 |           |           | 2.706187  |
| UD1838    | GS136  | NB  | -0.013625 | 0.013601  | 0.047018  | 0.158165  |
| 0.021556  |        |     | 0.019480  | 0.016686  | 0.012927  | -0.632059 |
| 2.817748  |        |     | 12.235555 |           |           | 0.698184  |
| WK01      | GS136  | NB  | 0.006233  | 0.005996  | 0.076590  | 0.184886  |
| 0.017544  |        |     | 0.016171  | 0.014353  | 0.011502  | 0.355292  |
| 5.335992  |        |     | 16.074794 |           |           | 0.370767  |
| WK01      | HV74   | NB  | -0.037956 | -0.033516 | -0.025670 | 0.020531  |
| 0.009974  |        |     | 0.009393  | 0.008491  | 0.007192  | -3.805570 |
| -3.023338 |        |     | 2.854572  |           |           | -3.568281 |
| WK01      | UD1838 | NB  | 0.011993  | 0.000048  | 0.021232  | 0.008358  |
| 0.015235  |        |     | 0.014228  | 0.012125  | 0.009450  | 0.787195  |
| 1.751129  |        |     | 0.884425  |           |           | 0.003406  |
| HV74      | GS136  | SB  | 0.031221  | 0.030658  | 0.049178  | 0.050823  |
| 0.012485  |        |     | 0.011689  | 0.010349  | 0.009395  | 2.500713  |
| 4.751810  |        |     | 5.409498  |           |           | 2.622820  |
| HV74      | UD1838 | SB  | 0.034620  | 0.024095  | 0.015829  | -0.028152 |
| 0.010633  |        |     | 0.010321  | 0.009164  | 0.008017  | 3.255875  |
| 1.727234  |        |     | -3.511486 |           |           | 2.334505  |
| UD1838    | GS136  | SB  | -0.007680 | 0.023896  | 0.043870  | 0.155896  |
| 0.021562  |        |     | 0.020163  | 0.017266  | 0.013628  | -0.356207 |
| 2.540806  |        |     | 11.439702 |           |           | 1.185114  |
| WK01      | GS136  | SB  | 0.013600  | 0.014688  | 0.078991  | 0.186300  |
| 0.017740  |        |     | 0.016458  | 0.014516  | 0.011605  | 0.766624  |
| 5.441820  |        |     | 16.053547 |           |           | 0.892406  |
| WK01      | HV74   | SB  | -0.035707 | -0.033142 | -0.022437 | 0.021639  |
| 0.009935  |        |     | 0.009575  | 0.008332  | 0.007204  | -3.594132 |
| -2.692734 |        |     | 3.003959  |           |           | -3.461274 |
| WK01      | UD1838 | SB  | 0.007000  | -0.005606 | 0.023124  | 0.008717  |
| 0.015899  |        |     | 0.014694  | 0.012314  | 0.009604  | 0.440277  |
| 1.877838  |        |     | 0.907664  |           |           | -0.381539 |
| HV74      | GS136  | Swe | 0.029944  | 0.033769  | 0.054765  | 0.053322  |
| 0.012342  |        |     | 0.011301  | 0.010124  | 0.009176  | 2.426108  |
| 5.409430  |        |     | 5.811062  |           |           | 2.988142  |
| HV74      | UD1838 | Swe | 0.029127  | 0.019014  | 0.011898  | -0.032979 |
| 0.010507  |        |     | 0.009465  | 0.008532  | 0.007419  | 2.772207  |
| 1.394490  |        |     | -4.445505 |           |           | 2.008927  |
| UD1838    | GS136  | Swe | -0.011989 | 0.018701  | 0.047638  | 0.154837  |
| 0.020616  |        |     | 0.019011  | 0.017039  | 0.013331  | -0.581532 |
| 2.795913  |        |     | 11.614453 |           |           | 0.983671  |
| WK01      | GS136  | Swe | 0.009161  | 0.017200  | 0.080070  | 0.186317  |
| 0.017864  |        |     | 0.016343  | 0.014450  | 0.011373  | 0.512827  |
| 5.541240  |        |     | 16.382656 |           |           | 1.052424  |
| WK01      | HV74   | Swe | -0.033492 | -0.028936 | -0.023653 | 0.021247  |
| 0.009930  |        |     | 0.009242  | 0.008277  | 0.007120  | -3.372719 |
| -2.857768 |        |     | 2.984312  |           |           | -3.131031 |
| WK01      | UD1838 | Swe | 0.007941  | -0.003630 | 0.015302  | 0.003837  |
| 0.014557  |        |     | 0.013269  | 0.011561  | 0.008947  | 0.545534  |
| 1.323546  |        |     | 0.428866  |           |           | -0.273575 |
| HV74      | GS136  | Uap | 0.014833  | 0.019814  | 0.034653  | 0.034037  |
| 0.012347  |        |     | 0.011710  | 0.011150  | 0.010368  | 1.201383  |
| 3.108019  |        |     | 3.282755  |           |           | 1.692129  |
| HV74      | UD1838 | Uap | 0.033649  | 0.027156  | 0.027520  | -0.012090 |
| 0.010206  |        |     | 0.009973  | 0.009047  | 0.008128  | 3.296781  |
| 3.041820  |        |     | -1.487449 |           |           | 2.722788  |
| UD1838    | GS136  | Uap | -0.085179 | -0.047000 | -0.028361 | 0.068279  |

|              |           |           |           |           |           |
|--------------|-----------|-----------|-----------|-----------|-----------|
| 0.021030     | 0.020608  | 0.019184  | 0.015682  | -4.050330 | -2.280733 |
| -1.478367    | 4.353956  |           |           |           |           |
| WK01 GS136   | Uap       | -0.028352 | -0.025339 | 0.025479  | 0.116735  |
| 0.017796     | 0.016812  | 0.016169  | 0.013393  | -1.593195 | -1.507227 |
| 1.575741     | 8.716410  |           |           |           |           |
| WK01 HV74    | Uap       | -0.030856 | -0.030719 | -0.029283 | 0.007746  |
| 0.010194     | 0.009528  | 0.009002  | 0.008011  | -3.026857 | -3.224247 |
| -3.253073    | 0.966928  |           |           |           |           |
| WK01 UD1838  | Uap       | 0.010331  | 0.001642  | 0.028876  | 0.013913  |
| 0.014634     | 0.013559  | 0.012727  | 0.010409  | 0.706002  | 0.121131  |
| 2.268986     | 1.336659  |           |           |           |           |
| HV74 GS136   | WH2       | 0.031395  | 0.034691  | 0.052903  | 0.053881  |
| 0.012782     | 0.011872  | 0.010486  | 0.009579  | 2.456267  | 2.922093  |
| 5.045011     | 5.624932  |           |           |           |           |
| HV74 UD1838  | WH2       | 0.038198  | 0.026793  | 0.018052  | -0.025715 |
| 0.010796     | 0.010313  | 0.009018  | 0.008047  | 3.538043  | 2.597888  |
| 2.001892     | -3.195469 |           |           |           |           |
| UD1838 GS136 | WH2       | -0.012464 | 0.020965  | 0.050548  | 0.164447  |
| 0.021738     | 0.020291  | 0.017594  | 0.013775  | -0.573374 | 1.033197  |
| 2.873077     | 11.938465 |           |           |           |           |
| WK01 GS136   | WH2       | 0.008271  | 0.011928  | 0.083807  | 0.190951  |
| 0.017625     | 0.016225  | 0.014416  | 0.011808  | 0.469270  | 0.735149  |
| 5.813435     | 16.171426 |           |           |           |           |
| WK01 HV74    | WH2       | -0.037745 | -0.034838 | -0.023256 | 0.022391  |
| 0.010284     | 0.009600  | 0.008661  | 0.007527  | -3.670154 | -3.628838 |
| -2.685121    | 2.974579  |           |           |           |           |
| WK01 UD1838  | WH2       | 0.008856  | -0.000158 | 0.023367  | 0.012109  |
| 0.015667     | 0.014269  | 0.012301  | 0.009685  | 0.565257  | -0.011098 |
| 1.899508     | 1.250241  |           |           |           |           |

</pre></body></html>
