# Supplementary material
Source: PubMed Central journal article supplement (PMC6590514)
Supplement: NIHMS1017233-supplement-Supplemental_data_3.pdf [file NIHMS1017233-supplement-Supplemental_data_3.pdf]

<html><head></head><body><pre style="word-wrap: break-word; white-space: pre-wrap;">#  
Barlow et al. Supplementary Data 3: D-statistic tests inconsistent with the species tree  
as a measure of clade differentiation.  
# Comparisons within European cave bears and European cave bears relative to the Caucasus  
cave bear kudarensis are given.

| P1   | P2      | P3      | Outgrp     | D-stat         | Std_Err          | Z-score          |
|------|---------|---------|------------|----------------|------------------|------------------|
| WK01 | GS136   | VD-1838 | thibetanus | 0.242257314237 | 0.0139076322978  | 17.419019215465  |
| WK01 | VD-1838 | GS136   | thibetanus | 0.275154713662 | 0.0133264497096  | 20.6472631239351 |
| HV74 | GS136   | VD-1838 | thibetanus | 0.792444576154 | 0.00568692836111 | 139.34491975899  |
| HV74 | GS136   | WK01    | thibetanus | 0.728447400487 | 0.00643180282253 | 113.257110111541 |
| HV74 | VD-1838 | GS136   | thibetanus | 0.805694951879 | 0.00523821033702 | 153.811111055414 |
| HV74 | VD-1838 | WK01    | thibetanus | 0.733752030319 | 0.00626895086349 | 117.045426945732 |
| HV74 | WK01    | GS136   | thibetanus | 0.735032171753 | 0.00585594482038 | 125.518971626051 |
| HV74 | WK01    | VD-1838 | thibetanus | 0.726821061108 | 0.00608756325277 | 119.394416276049 |

</pre></body></html>
