# Supplementary material
Source: PubMed Central journal article supplement (PMC6590514)
Supplement: NIHMS1017233-supplement-Supplemental_data_4.pdf [file NIHMS1017233-supplement-Supplemental_data_4.pdf]

|                  |      |       |            |                |                  |                  |
|------------------|------|-------|------------|----------------|------------------|------------------|
| Den              | WH2  | NB    | thibetanus | 0.967155532838 | 0.00170375897509 |                  |
| 567.659831571488 |      |       |            |                |                  |                  |
| Den              | WH2  | SB    | thibetanus | 0.967991483973 | 0.00168692468724 |                  |
| 573.820213371081 |      |       |            |                |                  |                  |
| LS039            | NB   | SB    | thibetanus | 0.970727920358 | 0.00150595285603 |                  |
| 644.593830723916 |      |       |            |                |                  |                  |
| LS039            | NB   | WH2   | thibetanus | 0.970660307386 | 0.00155485163116 |                  |
| 624.278412122086 |      |       |            |                |                  |                  |
| LS039            | SB   | NB    | thibetanus | 0.972241010548 | 0.0014425395891  | 673.978737148268 |
| LS039            | SB   | WH2   | thibetanus | 0.971771757019 | 0.00158530894162 |                  |
| 612.985728842205 |      |       |            |                |                  |                  |
| LS039            | WH2  | NB    | thibetanus | 0.972197166159 | 0.00151387897698 |                  |
| 642.189488685821 |      |       |            |                |                  |                  |
| LS039            | WH2  | SB    | thibetanus | 0.972081779455 | 0.00156931588807 |                  |
| 619.430279680976 |      |       |            |                |                  |                  |
| NB               | 235  | 191Y  | thibetanus | 0.458535471099 | 0.00722863864584 |                  |
| 63.4331709695963 |      |       |            |                |                  |                  |
| NB               | 235  | Adm1  | thibetanus | 0.327785126041 | 0.0109243458955  | 30.0050116662841 |
| NB               | 235  | Ge    | thibetanus | 0.396420775197 | 0.00739376404357 |                  |
| 53.6155566854677 |      |       |            |                |                  |                  |
| NB               | 235  | Den   | thibetanus | 0.415517848274 | 0.0092874062776  | 44.7399237046595 |
| NB               | 235  | LS039 | thibetanus | 0.463142231179 | 0.00783899097554 |                  |
| 59.0818681414665 |      |       |            |                |                  |                  |
| NB               | 235  | Swe   | thibetanus | 0.459978492158 | 0.00724499626898 |                  |
| 63.4891275413671 |      |       |            |                |                  |                  |
| NB               | 235  | Uap   | thibetanus | 0.376611009867 | 0.00788828510986 |                  |
| 47.7430778200769 |      |       |            |                |                  |                  |
| NB               | 191Y | 235   | thibetanus | 0.438183085751 | 0.00743421183746 |                  |
| 58.9414312278612 |      |       |            |                |                  |                  |
| NB               | 191Y | Adm1  | thibetanus | 0.282208851222 | 0.0108975361752  | 25.8965739305583 |
| NB               | 191Y | Ge    | thibetanus | 0.443851631417 | 0.00733656942878 |                  |
| 60.4985253292707 |      |       |            |                |                  |                  |
| NB               | 191Y | Den   | thibetanus | 0.362673701221 | 0.00969577901503 |                  |
| 37.4053184028636 |      |       |            |                |                  |                  |
| NB               | 191Y | LS039 | thibetanus | 0.503034910104 | 0.00798818646186 |                  |
| 62.9723545520333 |      |       |            |                |                  |                  |
| NB               | 191Y | Swe   | thibetanus | 0.483868724795 | 0.00738208361844 |                  |
| 65.5463619493994 |      |       |            |                |                  |                  |
| NB               | 191Y | Uap   | thibetanus | 0.371144705336 | 0.00789084931767 |                  |
| 47.0348235525034 |      |       |            |                |                  |                  |
| NB               | Adm1 | 235   | thibetanus | 0.450946879781 | 0.00754547876117 |                  |
| 59.763852507495  |      |       |            |                |                  |                  |
| NB               | Adm1 | 191Y  | thibetanus | 0.423934200532 | 0.00759774326404 |                  |
| 55.7973842757328 |      |       |            |                |                  |                  |
| NB               | Adm1 | Ge    | thibetanus | 0.371702035939 | 0.00801361384127 |                  |
| 46.3838217440351 |      |       |            |                |                  |                  |
| NB               | Adm1 | Den   | thibetanus | 0.51626824747  | 0.00867107525162 |                  |
| 59.5391266352517 |      |       |            |                |                  |                  |
| NB               | Adm1 | LS039 | thibetanus | 0.431765248265 | 0.00821009407954 |                  |
| 52.5895615911372 |      |       |            |                |                  |                  |
| NB               | Adm1 | Swe   | thibetanus | 0.430655633506 | 0.00772002610706 |                  |
| 55.784219837309  |      |       |            |                |                  |                  |
| NB               | Adm1 | Uap   | thibetanus | 0.366634668733 | 0.00784060477104 |                  |
| 46.7610190080234 |      |       |            |                |                  |                  |
| NB               | Ge   | 235   | thibetanus | 0.361936344727 | 0.00745931471043 |                  |
| 48.5213935565585 |      |       |            |                |                  |                  |
| NB               | Ge   | 191Y  | thibetanus | 0.429705012576 | 0.00722881594333 |                  |
| 59.4433467312842 |      |       |            |                |                  |                  |
| NB               | Ge   | Adm1  | thibetanus | 0.218416766839 | 0.0107286664392  | 20.3582400549762 |
| NB               | Ge   | Den   | thibetanus | 0.28756940976  | 0.00942037569106 |                  |
| 30.526320731869  |      |       |            |                |                  |                  |

|                  |       |       |            |                |                  |                  |
|------------------|-------|-------|------------|----------------|------------------|------------------|
| NB               | Ge    | LS039 | thibetanus | 0.420522687189 | 0.00788286585934 |                  |
| 53.3464218080972 |       |       |            |                |                  |                  |
| NB               | Ge    | Swe   | thibetanus | 0.40387294511  | 0.00772951540774 |                  |
| 52.2507458495495 |       |       |            |                |                  |                  |
| NB               | Ge    | Uap   | thibetanus | 0.354276792861 | 0.00770122473708 |                  |
| 46.0026560652388 |       |       |            |                |                  |                  |
| NB               | Den   | 235   | thibetanus | 0.473827956341 | 0.00716127886843 |                  |
| 66.1652709029162 |       |       |            |                |                  |                  |
| NB               | Den   | 191Y  | thibetanus | 0.44150294056  | 0.0074847774609  | 58.9867825551772 |
| NB               | Den   | Adm1  | thibetanus | 0.450236397887 | 0.0106863621984  | 42.131867657865  |
| NB               | Den   | Ge    | thibetanus | 0.378650448278 | 0.00763644646687 |                  |
| 49.5846399134387 |       |       |            |                |                  |                  |
| NB               | Den   | LS039 | thibetanus | 0.445766110655 | 0.00799626014677 |                  |
| 55.74682444956   |       |       |            |                |                  |                  |
| NB               | Den   | Swe   | thibetanus | 0.449182995457 | 0.00771309539551 |                  |
| 58.23641124917   |       |       |            |                |                  |                  |
| NB               | Den   | Uap   | thibetanus | 0.373475777915 | 0.00818210526701 |                  |
| 45.6454379071415 |       |       |            |                |                  |                  |
| NB               | LS039 | 235   | thibetanus | 0.448027388327 | 0.00751479696917 |                  |
| 59.6193603320309 |       |       |            |                |                  |                  |
| NB               | LS039 | 191Y  | thibetanus | 0.508002357373 | 0.0075057487293  | 67.681769760014  |
| NB               | LS039 | Adm1  | thibetanus | 0.292521566169 | 0.0111203060442  | 26.3051722683091 |
| NB               | LS039 | Ge    | thibetanus | 0.439970094754 | 0.00733232032869 |                  |
| 60.0042108133873 |       |       |            |                |                  |                  |
| NB               | LS039 | Den   | thibetanus | 0.373594791052 | 0.00974822890666 |                  |
| 38.324376112748  |       |       |            |                |                  |                  |
| NB               | LS039 | Swe   | thibetanus | 0.493460249896 | 0.007600308593   | 64.926343957992  |
| NB               | LS039 | Uap   | thibetanus | 0.380405417494 | 0.00808286465862 |                  |
| 47.0631927615311 |       |       |            |                |                  |                  |
| NB               | Swe   | 235   | thibetanus | 0.456805455694 | 0.00709002419246 |                  |
| 64.4293225656123 |       |       |            |                |                  |                  |
| NB               | Swe   | 191Y  | thibetanus | 0.500940681393 | 0.00720563054383 |                  |
| 69.5207280398164 |       |       |            |                |                  |                  |
| NB               | Swe   | Adm1  | thibetanus | 0.306211661849 | 0.010881181443   | 28.141398381514  |
| NB               | Swe   | Ge    | thibetanus | 0.437060520629 | 0.00733156997085 |                  |
| 59.6134964771166 |       |       |            |                |                  |                  |
| NB               | Swe   | Den   | thibetanus | 0.388696080608 | 0.00932786828908 |                  |
| 41.6704083464644 |       |       |            |                |                  |                  |
| NB               | Swe   | LS039 | thibetanus | 0.507243298105 | 0.00760687259686 |                  |
| 66.6822392048977 |       |       |            |                |                  |                  |
| NB               | Swe   | Uap   | thibetanus | 0.381247448401 | 0.00796960081941 |                  |
| 47.8377094461833 |       |       |            |                |                  |                  |
| NB               | Uap   | 235   | thibetanus | 0.290584740415 | 0.00826319915374 |                  |
| 35.1661305758894 |       |       |            |                |                  |                  |
| NB               | Uap   | 191Y  | thibetanus | 0.307668055591 | 0.00801205039716 |                  |
| 38.4006640422604 |       |       |            |                |                  |                  |
| NB               | Uap   | Adm1  | thibetanus | 0.158812064549 | 0.0112757192006  | 14.0844288265488 |
| NB               | Uap   | Ge    | thibetanus | 0.307762361386 | 0.00812600608484 |                  |
| 37.8737547292964 |       |       |            |                |                  |                  |
| NB               | Uap   | Den   | thibetanus | 0.229051976157 | 0.0102739909425  | 22.2943525489681 |
| NB               | Uap   | LS039 | thibetanus | 0.313444269481 | 0.00860291878319 |                  |
| 36.4346424022352 |       |       |            |                |                  |                  |
| NB               | Uap   | Swe   | thibetanus | 0.302924236849 | 0.00848609931472 |                  |
| 35.6965227031396 |       |       |            |                |                  |                  |
| SB               | 235   | 191Y  | thibetanus | 0.462162792417 | 0.00732349224539 |                  |
| 63.1068862956635 |       |       |            |                |                  |                  |
| SB               | 235   | Adm1  | thibetanus | 0.333130662127 | 0.0108718950696  | 30.6414530304381 |
| SB               | 235   | Ge    | thibetanus | 0.40028269075  | 0.0073966220916  | 54.1169584971203 |
| SB               | 235   | Den   | thibetanus | 0.419643218726 | 0.00935797335615 |                  |
| 44.8433867841922 |       |       |            |                |                  |                  |
| SB               | 235   | LS039 | thibetanus | 0.464619484988 | 0.00790374027334 |                  |

|                  |    |       |       |            |                |                  |                  |
|------------------|----|-------|-------|------------|----------------|------------------|------------------|
| 58.7847612547697 | SB | 235   | Swe   | thibetanus | 0.46468163445  | 0.00734255303261 |                  |
| 63.2861121174392 | SB | 235   | Uap   | thibetanus | 0.382501470029 | 0.00806970709516 |                  |
| 47.3996720721641 | SB | 191Y  | 235   | thibetanus | 0.440798986695 | 0.00742890777712 |                  |
| 59.3356385514166 | SB | 191Y  | Adm1  | thibetanus | 0.287560464141 | 0.0108340646166  | 26.5422511603262 |
| 61.07434627822   | SB | 191Y  | Ge    | thibetanus | 0.446784133129 | 0.00731541408718 |                  |
| 37.9075994738606 | SB | 191Y  | Den   | thibetanus | 0.367994083768 | 0.00970765991188 |                  |
| 62.4576538767429 | SB | 191Y  | LS039 | thibetanus | 0.504205310329 | 0.00807275456302 |                  |
| 65.6027883938963 | SB | 191Y  | Swe   | thibetanus | 0.487643165815 | 0.00743326888618 |                  |
| 47.4772016008985 | SB | 191Y  | Uap   | thibetanus | 0.375701493095 | 0.00791330323664 |                  |
| 59.3037043842453 | SB | Adm1  | 235   | thibetanus | 0.453440646975 | 0.00764607627269 |                  |
| 56.1038628674166 | SB | Adm1  | 191Y  | thibetanus | 0.427752905138 | 0.00762430398329 |                  |
| 46.0889759206897 | SB | Adm1  | Ge    | thibetanus | 0.374769301313 | 0.00813143043052 |                  |
| 59.755325435495  | SB | Adm1  | Den   | thibetanus | 0.519117178934 | 0.00868737932813 |                  |
| 52.1363954007077 | SB | Adm1  | LS039 | thibetanus | 0.434453954896 | 0.00833302631601 |                  |
| 56.0365144816077 | SB | Adm1  | Swe   | thibetanus | 0.435099913119 | 0.00776457845646 |                  |
| 45.6954957675678 | SB | Adm1  | Uap   | thibetanus | 0.370209542112 | 0.00810166376124 |                  |
| 48.9941164188998 | SB | Ge    | 235   | thibetanus | 0.366019923878 | 0.00747069139381 |                  |
| 59.2928042710379 | SB | Ge    | 191Y  | thibetanus | 0.430765253645 | 0.00726505111271 |                  |
| 30.5858368010801 | SB | Ge    | Adm1  | thibetanus | 0.222520107239 | 0.0107030974742  | 20.7902532678403 |
| 53.4327548721597 | SB | Ge    | Den   | thibetanus | 0.291004800939 | 0.00951436453518 |                  |
| 52.6652990649644 | SB | Ge    | LS039 | thibetanus | 0.423372322632 | 0.00792346049993 |                  |
| 46.6170574792992 | SB | Ge    | Swe   | thibetanus | 0.408548506708 | 0.00775745156605 |                  |
| 65.8130569836172 | SB | Ge    | Uap   | thibetanus | 0.359906506949 | 0.00772048958922 |                  |
| 58.3318282864672 | SB | Den   | 235   | thibetanus | 0.476259159437 | 0.00723654516695 |                  |
| 58.3813422135523 | SB | Den   | 191Y  | thibetanus | 0.443991058439 | 0.00761147166961 |                  |
| 45.2457057276052 | SB | Den   | Adm1  | thibetanus | 0.454579761191 | 0.0106670150517  | 42.6154607439645 |
| 59.5081607742809 | SB | Den   | Ge    | thibetanus | 0.381119362315 | 0.0077772152486  | 49.0046051359587 |
| 59.5081607742809 | SB | Den   | LS039 | thibetanus | 0.447765911137 | 0.00811415448413 |                  |
| 59.5081607742809 | SB | Den   | Swe   | thibetanus | 0.452694554139 | 0.00775409637694 |                  |
| 59.5081607742809 | SB | Den   | Uap   | thibetanus | 0.376800498531 | 0.00832787316435 |                  |
| 59.5081607742809 | SB | LS039 | 235   | thibetanus | 0.449227586364 | 0.00754900807753 |                  |
| 59.5081607742809 | SB | LS039 | 191Y  | thibetanus | 0.509539146925 | 0.0075524010622  | 67.4671727214355 |
| 59.5081607742809 | SB | LS039 | Adm1  | thibetanus | 0.297090101143 | 0.0111290010194  | 26.6951274984264 |

|                   |       |       |            |                  |                  |                   |
|-------------------|-------|-------|------------|------------------|------------------|-------------------|
| SB                | LS039 | Ge    | thibetanus | 0.442537076511   | 0.00731744610429 |                   |
| 60.4769847572302  |       |       |            |                  |                  |                   |
| SB                | LS039 | Den   | thibetanus | 0.376189639438   | 0.00982944792988 |                   |
| 38.2716956355648  |       |       |            |                  |                  |                   |
| SB                | LS039 | Swe   | thibetanus | 0.496587093229   | 0.00775831588527 |                   |
| 64.0070732582343  |       |       |            |                  |                  |                   |
| SB                | LS039 | Uap   | thibetanus | 0.384173119961   | 0.00802802142162 |                   |
| 47.8540227765706  |       |       |            |                  |                  |                   |
| SB                | Swe   | 235   | thibetanus | 0.459466542094   | 0.00721513438906 |                   |
| 63.6809402733606  |       |       |            |                  |                  |                   |
| SB                | Swe   | 191Y  | thibetanus | 0.502187936748   | 0.00722033373128 |                   |
| 69.5519009838031  |       |       |            |                  |                  |                   |
| SB                | Swe   | Adm1  | thibetanus | 0.310462072014   | 0.0107857808867  | 28.7843852267417  |
| SB                | Swe   | Ge    | thibetanus | 0.439986215611   | 0.00737312062606 |                   |
| 59.6743547170361  |       |       |            |                  |                  |                   |
| SB                | Swe   | Den   | thibetanus | 0.391508205262   | 0.00942770173851 |                   |
| 41.5274280117262  |       |       |            |                  |                  |                   |
| SB                | Swe   | LS039 | thibetanus | 0.50969402838    | 0.00769013918716 |                   |
| 66.2789080893388  |       |       |            |                  |                  |                   |
| SB                | Swe   | Uap   | thibetanus | 0.385387364099   | 0.00800646246288 |                   |
| 48.1345370550045  |       |       |            |                  |                  |                   |
| SB                | Uap   | 235   | thibetanus | 0.292935991266   | 0.0083490954644  | 35.0859554205674  |
| SB                | Uap   | 191Y  | thibetanus | 0.311365679546   | 0.00813684018753 |                   |
| 38.266166272158   |       |       |            |                  |                  |                   |
| SB                | Uap   | Adm1  | thibetanus | 0.161872081727   | 0.0112428916441  | 14.3977267460322  |
| SB                | Uap   | Ge    | thibetanus | 0.310218919397   | 0.00812221622596 |                   |
| 38.1938760021541  |       |       |            |                  |                  |                   |
| SB                | Uap   | Den   | thibetanus | 0.230250336088   | 0.0104045107712  | 22.1298570544364  |
| SB                | Uap   | LS039 | thibetanus | 0.315662993752   | 0.00875211234314 |                   |
| 36.0670637414087  |       |       |            |                  |                  |                   |
| SB                | Uap   | Swe   | thibetanus | 0.306915780603   | 0.00852951285663 |                   |
| 35.9828029761904  |       |       |            |                  |                  |                   |
| Swe               | NB    | SB    | thibetanus | 0.96974640779    | 0.00144942936563 |                   |
| 669.053926176317  |       |       |            |                  |                  |                   |
| Swe               | NB    | WH2   | thibetanus | 0.968495713024   | 0.00155735495057 |                   |
| 621.885018999378  |       |       |            |                  |                  |                   |
| Swe               | SB    | NB    | thibetanus | 0.969564353416   | 0.00150046874678 |                   |
| 646.174307526685  |       |       |            |                  |                  |                   |
| Swe               | SB    | WH2   | thibetanus | 0.969055819802   | 0.0015937376148  | 608.039749330763  |
| Swe               | WH2   | NB    | thibetanus | 0.969739436118   | 0.00152123862186 |                   |
| 637.467010226385  |       |       |            |                  |                  |                   |
| Swe               | WH2   | SB    | thibetanus | 0.971181785615   | 0.00153993367379 |                   |
| 630.664685203474  |       |       |            |                  |                  |                   |
| Uap               | NB    | SB    | thibetanus | 0.97519246743    | 0.0013303060179  | 733.058750624479  |
| Uap               | NB    | WH2   | thibetanus | 0.974386656385   | 0.0013286412366  | 733.370777259978  |
| Uap               | SB    | NB    | thibetanus | 0.973970984779   | 0.00137585574486 |                   |
| 707.901964590122  |       |       |            |                  |                  |                   |
| Uap               | SB    | WH2   | thibetanus | 0.974372651376   | 0.00145805544693 |                   |
| 668.268585688963  |       |       |            |                  |                  |                   |
| Uap               | WH2   | NB    | thibetanus | 0.974657365989   | 0.00145117278552 |                   |
| 671.634264171892  |       |       |            |                  |                  |                   |
| Uap               | WH2   | SB    | thibetanus | 0.975615899441   | 0.00141265117715 |                   |
| 690.62760518792   |       |       |            |                  |                  |                   |
| UD1838            | GS136 | WK01  | thibetanus | -0.0352468955137 | 0.0153531749389  |                   |
| -2.29573984885665 |       |       |            |                  |                  |                   |
| UD1838            | WK01  | GS136 | thibetanus | -0.275154713662  | 0.0133264497096  | -20.6472631239351 |
| WH2               | 235   | 191Y  | thibetanus | 0.46045063306    | 0.00732147575212 |                   |
| 62.8904128961531  |       |       |            |                  |                  |                   |
| WH2               | 235   | Adm1  | thibetanus | 0.330992382344   | 0.0109115107144  | 30.3342397773745  |
| WH2               | 235   | Ge    | thibetanus | 0.398346512908   | 0.00739504363958 |                   |
| 53.8666885988281  |       |       |            |                  |                  |                   |

|                  |       |       |            |                |                  |                  |
|------------------|-------|-------|------------|----------------|------------------|------------------|
| WH2              | 235   | Den   | thibetanus | 0.417487659078 | 0.00931005203354 |                  |
| 44.8426773098557 |       |       |            |                |                  |                  |
| WH2              | 235   | LS039 | thibetanus | 0.464994515106 | 0.00790470641698 |                  |
| 58.8250202571915 |       |       |            |                |                  |                  |
| WH2              | 235   | Swe   | thibetanus | 0.461323458304 | 0.00738431529884 |                  |
| 62.4734236871588 |       |       |            |                |                  |                  |
| WH2              | 235   | Uap   | thibetanus | 0.380671207783 | 0.00800640496485 |                  |
| 47.5458347977945 |       |       |            |                |                  |                  |
| WH2              | 191Y  | 235   | thibetanus | 0.438119041007 | 0.00742660311579 |                  |
| 58.9931943549666 |       |       |            |                |                  |                  |
| WH2              | 191Y  | Adm1  | thibetanus | 0.284248489143 | 0.0108917654848  | 26.0975587052148 |
| WH2              | 191Y  | Ge    | thibetanus | 0.444930787014 | 0.00735334547754 |                  |
| 60.5072600455117 |       |       |            |                |                  |                  |
| WH2              | 191Y  | Den   | thibetanus | 0.363948927936 | 0.0096876839966  | 37.5682080530013 |
| WH2              | 191Y  | LS039 | thibetanus | 0.503948995507 | 0.00813627958044 |                  |
| 61.9385052498094 |       |       |            |                |                  |                  |
| WH2              | 191Y  | Swe   | thibetanus | 0.484998219651 | 0.00745844843765 |                  |
| 65.0266906992003 |       |       |            |                |                  |                  |
| WH2              | 191Y  | Uap   | thibetanus | 0.376230478335 | 0.00803296761057 |                  |
| 46.8358017328423 |       |       |            |                |                  |                  |
| WH2              | Adm1  | 235   | thibetanus | 0.4506815584   | 0.00762989202895 |                  |
| 59.0678815230917 |       |       |            |                |                  |                  |
| WH2              | Adm1  | 191Y  | thibetanus | 0.425339684773 | 0.00756306516607 |                  |
| 56.2390612051303 |       |       |            |                |                  |                  |
| WH2              | Adm1  | Ge    | thibetanus | 0.372038473326 | 0.0080988458806  | 45.9372210325896 |
| WH2              | Adm1  | Den   | thibetanus | 0.517784465686 | 0.00867254500048 |                  |
| 59.7038661266493 |       |       |            |                |                  |                  |
| WH2              | Adm1  | LS039 | thibetanus | 0.433902976137 | 0.00834211762781 |                  |
| 52.0135288779079 |       |       |            |                |                  |                  |
| WH2              | Adm1  | Swe   | thibetanus | 0.431504660112 | 0.00774473625374 |                  |
| 55.7158624870696 |       |       |            |                |                  |                  |
| WH2              | Adm1  | Uap   | thibetanus | 0.369790379901 | 0.0080051818904  | 46.193876037278  |
| WH2              | Ge    | 235   | thibetanus | 0.363887161333 | 0.00748399775402 |                  |
| 48.6220297350489 |       |       |            |                |                  |                  |
| WH2              | Ge    | 191Y  | thibetanus | 0.430268477718 | 0.00720883100166 |                  |
| 59.6863038707553 |       |       |            |                |                  |                  |
| WH2              | Ge    | Adm1  | thibetanus | 0.22064807047  | 0.0108098249167  | 20.411807977493  |
| WH2              | Ge    | Den   | thibetanus | 0.289188102894 | 0.00955812069845 |                  |
| 30.2557492228463 |       |       |            |                |                  |                  |
| WH2              | Ge    | LS039 | thibetanus | 0.42253919672  | 0.00792068056167 |                  |
| 53.3463246535613 |       |       |            |                |                  |                  |
| WH2              | Ge    | Swe   | thibetanus | 0.405241935484 | 0.00771719876803 |                  |
| 52.5115327031349 |       |       |            |                |                  |                  |
| WH2              | Ge    | Uap   | thibetanus | 0.35833755702  | 0.00781758121331 |                  |
| 45.8373948722022 |       |       |            |                |                  |                  |
| WH2              | Den   | 235   | thibetanus | 0.474096897693 | 0.00725064219406 |                  |
| 65.3868836723729 |       |       |            |                |                  |                  |
| WH2              | Den   | 191Y  | thibetanus | 0.442901008919 | 0.00759188452296 |                  |
| 58.3387441655023 |       |       |            |                |                  |                  |
| WH2              | Den   | Adm1  | thibetanus | 0.453433214703 | 0.0106835282697  | 42.4422721835258 |
| WH2              | Den   | Ge    | thibetanus | 0.380483965048 | 0.00777894237969 |                  |
| 48.9120431128791 |       |       |            |                |                  |                  |
| WH2              | Den   | LS039 | thibetanus | 0.447021943574 | 0.0080900149509  | 55.2560095731677 |
| WH2              | Den   | Swe   | thibetanus | 0.449304985248 | 0.00792887050439 |                  |
| 56.6669596885498 |       |       |            |                |                  |                  |
| WH2              | Den   | Uap   | thibetanus | 0.375755193814 | 0.00836691597605 |                  |
| 44.9096411257847 |       |       |            |                |                  |                  |
| WH2              | LS039 | 235   | thibetanus | 0.449234216531 | 0.00754013720293 |                  |
| 59.5790506778091 |       |       |            |                |                  |                  |
| WH2              | LS039 | 191Y  | thibetanus | 0.509012575832 | 0.00762677276449 |                  |
| 66.7402309666214 |       |       |            |                |                  |                  |

|                  |       |       |            |                |                  |                  |
|------------------|-------|-------|------------|----------------|------------------|------------------|
| WH2              | LS039 | Adm1  | thibetanus | 0.296574692433 | 0.0111256186803  | 26.6569168830261 |
| WH2              | LS039 | Ge    | thibetanus | 0.441122785669 | 0.00728256625506 |                  |
| 60.5724369980848 |       |       |            |                |                  |                  |
| WH2              | LS039 | Den   | thibetanus | 0.373937809319 | 0.00974308198406 |                  |
| 38.3798278543457 |       |       |            |                |                  |                  |
| WH2              | LS039 | Swe   | thibetanus | 0.494796068982 | 0.00773142489929 |                  |
| 63.9980437535439 |       |       |            |                |                  |                  |
| WH2              | LS039 | Uap   | thibetanus | 0.384239545011 | 0.00813313225996 |                  |
| 47.2437349755935 |       |       |            |                |                  |                  |
| WH2              | Swe   | 235   | thibetanus | 0.458090632024 | 0.00715589211202 |                  |
| 64.0158662054909 |       |       |            |                |                  |                  |
| WH2              | Swe   | 191Y  | thibetanus | 0.502854361198 | 0.00721231148218 |                  |
| 69.7216644678256 |       |       |            |                |                  |                  |
| WH2              | Swe   | Adm1  | thibetanus | 0.308358358943 | 0.0107723219866  | 28.6250596042873 |
| WH2              | Swe   | Ge    | thibetanus | 0.438280865497 | 0.00732318427928 |                  |
| 59.8484004747851 |       |       |            |                |                  |                  |
| WH2              | Swe   | Den   | thibetanus | 0.389510028637 | 0.00939471000273 |                  |
| 41.4605696741903 |       |       |            |                |                  |                  |
| WH2              | Swe   | LS039 | thibetanus | 0.509526266506 | 0.00763641928569 |                  |
| 66.7231915173659 |       |       |            |                |                  |                  |
| WH2              | Swe   | Uap   | thibetanus | 0.383762788006 | 0.00799494512292 |                  |
| 48.000678191752  |       |       |            |                |                  |                  |
| WH2              | Uap   | 235   | thibetanus | 0.291718664204 | 0.00835770797772 |                  |
| 34.9041465652622 |       |       |            |                |                  |                  |
| WH2              | Uap   | 191Y  | thibetanus | 0.311779434829 | 0.00808154246616 |                  |
| 38.57919897526   |       |       |            |                |                  |                  |
| WH2              | Uap   | Adm1  | thibetanus | 0.160791071457 | 0.0113435716011  | 14.1746424416634 |
| WH2              | Uap   | Ge    | thibetanus | 0.309395650806 | 0.00807439755447 |                  |
| 38.3181096445664 |       |       |            |                |                  |                  |
| WH2              | Uap   | Den   | thibetanus | 0.230573019286 | 0.0103540733726  | 22.2688222295358 |
| WH2              | Uap   | LS039 | thibetanus | 0.315892860421 | 0.00880011715189 |                  |
| 35.8964380778903 |       |       |            |                |                  |                  |
| WH2              | Uap   | Swe   | thibetanus | 0.304519899393 | 0.00864899966779 |                  |
| 35.2086843669415 |       |       |            |                |                  |                  |

</pre></body></html>
