# Supplementary material
Source: PubMed Central journal article supplement (PMC6590514)
Supplement: NIHMS1017233-supplement-Supplemental_data_5.pdf [file NIHMS1017233-supplement-Supplemental_data_5.pdf]

```

<html><head></head><body><pre style="word-wrap: break-word; white-space: pre-wrap;"># Barlow et al. Supplementary Data
5: f-hat estimates of cave bear ancestry in brown bears relative polar bears, and among polar bears.
# In these tests: P1 is a polar bear, P2 is the measured brown bear, and P3 and P4 are cave bears.
# fhat values, weighted block jackknife standard error, and Zscore are presented in adjacent columns with prefix "F",
"SE" and "Z", respectively.
# Outgroup is U. thibetanus

```

| P1                                                               | P2  | P3     | P4     | Fthibetanus | SEthibetanus | Zthibetanus |
|------------------------------------------------------------------|-----|--------|--------|-------------|--------------|-------------|
| # Cave Bear Ancestry in the Late Pleistocene Austrian Brown Bear |     |        |        |             |              |             |
| NB                                                               | Uap | GS136  | E-1838 | 2.7111%     | 0.003082     | 8.797043    |
| SB                                                               | Uap | GS136  | E-1838 | 2.6973%     | 0.003185     | 8.468420    |
| WH2                                                              | Uap | GS136  | E-1838 | 2.4681%     | 0.003329     | 7.413220    |
| NB                                                               | Uap | GS136  | WK01   | 2.4150%     | 0.003159     | 7.644208    |
| SB                                                               | Uap | GS136  | WK01   | 2.4033%     | 0.003200     | 7.510565    |
| WH2                                                              | Uap | GS136  | WK01   | 2.2166%     | 0.003280     | 6.758645    |
| NB                                                               | Uap | E-1838 | GS136  | 2.4084%     | 0.003107     | 7.751993    |
| SB                                                               | Uap | E-1838 | GS136  | 2.3325%     | 0.003189     | 7.314644    |
| WH2                                                              | Uap | E-1838 | GS136  | 2.1145%     | 0.003300     | 6.406865    |
| NB                                                               | Uap | E-1838 | HV74   | 3.8986%     | 0.004331     | 9.002326    |
| SB                                                               | Uap | E-1838 | HV74   | 3.7941%     | 0.004390     | 8.641828    |
| WH2                                                              | Uap | E-1838 | HV74   | 3.8629%     | 0.004506     | 8.571928    |
| NB                                                               | Uap | E-1838 | WK01   | 2.3624%     | 0.002748     | 8.597842    |
| SB                                                               | Uap | E-1838 | WK01   | 2.3289%     | 0.002765     | 8.423275    |
| WH2                                                              | Uap | E-1838 | WK01   | 2.3249%     | 0.002824     | 8.232916    |
| NB                                                               | Uap | WK01   | GS136  | 2.2420%     | 0.003149     | 7.119644    |
| SB                                                               | Uap | WK01   | GS136  | 2.2227%     | 0.003223     | 6.897050    |
| WH2                                                              | Uap | WK01   | GS136  | 2.0052%     | 0.003271     | 6.130776    |
| NB                                                               | Uap | WK01   | E-1838 | 2.3934%     | 0.002742     | 8.730345    |
| SB                                                               | Uap | WK01   | E-1838 | 2.4102%     | 0.002762     | 8.724859    |
| WH2                                                              | Uap | WK01   | E-1838 | 2.3346%     | 0.002824     | 8.268411    |

|                                                           |      |        |        |         |          |          |
|-----------------------------------------------------------|------|--------|--------|---------|----------|----------|
| # Cave Bear Ancestry in Contemporary Eurasian Brown Bears |      |        |        |         |          |          |
| NB                                                        | 235  | GS136  | E-1838 | 1.0667% | 0.003016 | 3.536986 |
| SB                                                        | 235  | GS136  | E-1838 | 1.0471% | 0.003036 | 3.449033 |
| WH2                                                       | 235  | GS136  | E-1838 | 0.9276% | 0.003103 | 2.989963 |
| NB                                                        | 235  | GS136  | WK01   | 1.0613% | 0.003051 | 3.478388 |
| SB                                                        | 235  | GS136  | WK01   | 1.1124% | 0.003069 | 3.624946 |
| WH2                                                       | 235  | GS136  | WK01   | 0.9708% | 0.003066 | 3.166686 |
| NB                                                        | 235  | E-1838 | GS136  | 1.0534% | 0.002988 | 3.525846 |
| SB                                                        | 235  | E-1838 | GS136  | 0.9364% | 0.003050 | 3.070424 |
| WH2                                                       | 235  | E-1838 | GS136  | 0.8618% | 0.003108 | 2.772632 |
| NB                                                        | 235  | E-1838 | HV74   | 1.8047% | 0.004292 | 4.205085 |
| SB                                                        | 235  | E-1838 | HV74   | 1.8484% | 0.004332 | 4.266825 |
| WH2                                                       | 235  | E-1838 | HV74   | 1.9057% | 0.004384 | 4.347212 |
| NB                                                        | 235  | E-1838 | WK01   | 0.9294% | 0.002693 | 3.450609 |
| SB                                                        | 235  | E-1838 | WK01   | 0.9758% | 0.002725 | 3.581241 |
| WH2                                                       | 235  | E-1838 | WK01   | 0.9236% | 0.002711 | 3.406580 |
| NB                                                        | 235  | WK01   | GS136  | 1.1822% | 0.003001 | 3.939581 |
| SB                                                        | 235  | WK01   | GS136  | 1.1523% | 0.003040 | 3.790141 |
| WH2                                                       | 235  | WK01   | GS136  | 1.0484% | 0.003043 | 3.445522 |
| NB                                                        | 235  | WK01   | E-1838 | 0.9800% | 0.002655 | 3.691349 |
| SB                                                        | 235  | WK01   | E-1838 | 1.0249% | 0.002695 | 3.803504 |
| WH2                                                       | 235  | WK01   | E-1838 | 0.9619% | 0.002687 | 3.579809 |
| NB                                                        | 191Y | GS136  | E-1838 | 1.1998% | 0.003147 | 3.813274 |
| SB                                                        | 191Y | GS136  | E-1838 | 1.1817% | 0.003148 | 3.753939 |
| WH2                                                       | 191Y | GS136  | E-1838 | 1.1251% | 0.003220 | 3.494645 |
| NB                                                        | 191Y | GS136  | WK01   | 1.2309% | 0.003136 | 3.925297 |
| SB                                                        | 191Y | GS136  | WK01   | 1.2905% | 0.003120 | 4.135855 |
| WH2                                                       | 191Y | GS136  | WK01   | 1.1955% | 0.003203 | 3.732133 |
| NB                                                        | 191Y | E-1838 | GS136  | 1.2810% | 0.003144 | 4.074677 |
| SB                                                        | 191Y | E-1838 | GS136  | 1.1897% | 0.003164 | 3.760078 |
| WH2                                                       | 191Y | E-1838 | GS136  | 1.1860% | 0.003231 | 3.670227 |
| NB                                                        | 191Y | E-1838 | HV74   | 2.4031% | 0.004543 | 5.289771 |
| SB                                                        | 191Y | E-1838 | HV74   | 2.3907% | 0.004654 | 5.137302 |
| WH2                                                       | 191Y | E-1838 | HV74   | 2.3458% | 0.004672 | 5.021380 |
| NB                                                        | 191Y | E-1838 | WK01   | 1.3137% | 0.002804 | 4.684634 |
| SB                                                        | 191Y | E-1838 | WK01   | 1.3536% | 0.002854 | 4.742411 |
| WH2                                                       | 191Y | E-1838 | WK01   | 1.3379% | 0.002824 | 4.737952 |
| NB                                                        | 191Y | WK01   | GS136  | 1.2752% | 0.003121 | 4.085510 |
| SB                                                        | 191Y | WK01   | GS136  | 1.2874% | 0.003106 | 4.144381 |
| WH2                                                       | 191Y | WK01   | GS136  | 1.2178% | 0.003187 | 3.821408 |
| NB                                                        | 191Y | WK01   | E-1838 | 1.2711% | 0.002750 | 4.621375 |
| SB                                                        | 191Y | WK01   | E-1838 | 1.3101% | 0.002786 | 4.701552 |
| WH2                                                       | 191Y | WK01   | E-1838 | 1.2422% | 0.002764 | 4.493417 |
| NB                                                        | Ge   | GS136  | E-1838 | 1.8494% | 0.003050 | 6.062974 |
| SB                                                        | Ge   | GS136  | E-1838 | 1.8054% | 0.003038 | 5.942019 |
| WH2                                                       | Ge   | GS136  | E-1838 | 1.6659% | 0.003104 | 5.366618 |
| NB                                                        | Ge   | GS136  | WK01   | 1.9364% | 0.002992 | 6.471917 |
| SB                                                        | Ge   | GS136  | WK01   | 1.9166% | 0.002985 | 6.421242 |

|     |       |        |        |         |          |          |
|-----|-------|--------|--------|---------|----------|----------|
| WH2 | Ge    | GS136  | WK01   | 1.8101% | 0.003015 | 6.003591 |
| NB  | Ge    | E-1838 | GS136  | 1.8217% | 0.003042 | 5.988630 |
| SB  | Ge    | E-1838 | GS136  | 1.7345% | 0.003077 | 5.637520 |
| WH2 | Ge    | E-1838 | GS136  | 1.6433% | 0.003144 | 5.227191 |
| NB  | Ge    | E-1838 | HV74   | 3.3591% | 0.004392 | 7.647580 |
| SB  | Ge    | E-1838 | HV74   | 3.3234% | 0.004404 | 7.547052 |
| WH2 | Ge    | E-1838 | HV74   | 3.3528% | 0.004577 | 7.325845 |
| NB  | Ge    | E-1838 | WK01   | 1.7968% | 0.002740 | 6.558468 |
| SB  | Ge    | E-1838 | WK01   | 1.8677% | 0.002769 | 6.744061 |
| WH2 | Ge    | E-1838 | WK01   | 1.7381% | 0.002811 | 6.183822 |
| NB  | Ge    | WK01   | GS136  | 1.9882% | 0.002940 | 6.763259 |
| SB  | Ge    | WK01   | GS136  | 1.9407% | 0.002977 | 6.520098 |
| WH2 | Ge    | WK01   | GS136  | 1.8650% | 0.003003 | 6.210121 |
| NB  | Ge    | WK01   | E-1838 | 1.8583% | 0.002713 | 6.849195 |
| SB  | Ge    | WK01   | E-1838 | 1.9149% | 0.002755 | 6.949762 |
| WH2 | Ge    | WK01   | E-1838 | 1.7927% | 0.002780 | 6.448076 |
| NB  | LS039 | GS136  | E-1838 | 1.3182% | 0.003132 | 4.208754 |
| SB  | LS039 | GS136  | E-1838 | 1.3907% | 0.003111 | 4.470356 |
| WH2 | LS039 | GS136  | E-1838 | 1.2384% | 0.003235 | 3.827950 |
| NB  | LS039 | GS136  | WK01   | 1.3684% | 0.003106 | 4.406257 |
| SB  | LS039 | GS136  | WK01   | 1.4161% | 0.003099 | 4.569486 |
| WH2 | LS039 | GS136  | WK01   | 1.3239% | 0.003116 | 4.248075 |
| NB  | LS039 | E-1838 | GS136  | 1.3439% | 0.003135 | 4.286217 |
| SB  | LS039 | E-1838 | GS136  | 1.3490% | 0.003159 | 4.269992 |
| WH2 | LS039 | E-1838 | GS136  | 1.2263% | 0.003241 | 3.783393 |
| NB  | LS039 | E-1838 | HV74   | 2.4813% | 0.004665 | 5.318835 |
| SB  | LS039 | E-1838 | HV74   | 2.3874% | 0.004676 | 5.105844 |
| WH2 | LS039 | E-1838 | HV74   | 2.4048% | 0.004737 | 5.076723 |
| NB  | LS039 | E-1838 | WK01   | 1.4731% | 0.002828 | 5.208184 |
| SB  | LS039 | E-1838 | WK01   | 1.4682% | 0.002849 | 5.153187 |
| WH2 | LS039 | E-1838 | WK01   | 1.3734% | 0.002868 | 4.789149 |
| NB  | LS039 | WK01   | GS136  | 1.4696% | 0.003055 | 4.811329 |
| SB  | LS039 | WK01   | GS136  | 1.4679% | 0.003091 | 4.748775 |
| WH2 | LS039 | WK01   | GS136  | 1.3947% | 0.003098 | 4.502500 |
| NB  | LS039 | WK01   | E-1838 | 1.4848% | 0.002804 | 5.294807 |
| SB  | LS039 | WK01   | E-1838 | 1.4764% | 0.002808 | 5.257329 |
| WH2 | LS039 | WK01   | E-1838 | 1.4143% | 0.002848 | 4.965359 |
| NB  | Swe   | GS136  | E-1838 | 1.2986% | 0.003086 | 4.208208 |
| SB  | Swe   | GS136  | E-1838 | 1.3030% | 0.003141 | 4.148467 |
| WH2 | Swe   | GS136  | E-1838 | 1.1717% | 0.003179 | 3.685283 |
| NB  | Swe   | GS136  | WK01   | 1.4264% | 0.003142 | 4.539891 |
| SB  | Swe   | GS136  | WK01   | 1.4992% | 0.003159 | 4.746367 |
| WH2 | Swe   | GS136  | WK01   | 1.4181% | 0.003212 | 4.415368 |
| NB  | Swe   | E-1838 | GS136  | 1.3249% | 0.003046 | 4.348861 |
| SB  | Swe   | E-1838 | GS136  | 1.2915% | 0.003118 | 4.142057 |
| WH2 | Swe   | E-1838 | GS136  | 1.1561% | 0.003154 | 3.665067 |
| NB  | Swe   | E-1838 | HV74   | 2.5389% | 0.004415 | 5.750390 |
| SB  | Swe   | E-1838 | HV74   | 2.3916% | 0.004407 | 5.426664 |
| WH2 | Swe   | E-1838 | HV74   | 2.5517% | 0.004493 | 5.679659 |
| NB  | Swe   | E-1838 | WK01   | 1.3506% | 0.002847 | 4.743739 |
| SB  | Swe   | E-1838 | WK01   | 1.3149% | 0.002872 | 4.578015 |
| WH2 | Swe   | E-1838 | WK01   | 1.3319% | 0.002905 | 4.585521 |
| NB  | Swe   | WK01   | GS136  | 1.4952% | 0.003074 | 4.863399 |
| SB  | Swe   | WK01   | GS136  | 1.5143% | 0.003108 | 4.871694 |
| WH2 | Swe   | WK01   | GS136  | 1.4633% | 0.003147 | 4.649360 |
| NB  | Swe   | WK01   | E-1838 | 1.3496% | 0.002837 | 4.757697 |
| SB  | Swe   | WK01   | E-1838 | 1.3110% | 0.002845 | 4.608120 |
| WH2 | Swe   | WK01   | E-1838 | 1.3223% | 0.002896 | 4.565898 |

#### # Cave Bear Ancestry in Contemporary North American Brown Bears

|     |      |        |        |         |          |          |
|-----|------|--------|--------|---------|----------|----------|
| NB  | Adm1 | GS136  | E-1838 | 0.9220% | 0.002896 | 3.184221 |
| SB  | Adm1 | GS136  | E-1838 | 0.8847% | 0.002980 | 2.968309 |
| WH2 | Adm1 | GS136  | E-1838 | 0.7245% | 0.003040 | 2.383629 |
| NB  | Adm1 | GS136  | WK01   | 0.9308% | 0.002864 | 3.250008 |
| SB  | Adm1 | GS136  | WK01   | 0.8790% | 0.002944 | 2.985692 |
| WH2 | Adm1 | GS136  | WK01   | 0.7726% | 0.002933 | 2.634170 |
| NB  | Adm1 | E-1838 | GS136  | 1.0304% | 0.002854 | 3.610186 |
| SB  | Adm1 | E-1838 | GS136  | 0.9008% | 0.002963 | 3.040005 |
| WH2 | Adm1 | E-1838 | GS136  | 0.8110% | 0.003022 | 2.683837 |
| NB  | Adm1 | E-1838 | HV74   | 1.4841% | 0.004019 | 3.692706 |
| SB  | Adm1 | E-1838 | HV74   | 1.5051% | 0.004188 | 3.594204 |
| WH2 | Adm1 | E-1838 | HV74   | 1.5257% | 0.004256 | 3.584637 |
| NB  | Adm1 | E-1838 | WK01   | 0.9269% | 0.002475 | 3.745048 |
| SB  | Adm1 | E-1838 | WK01   | 0.9260% | 0.002564 | 3.610765 |
| WH2 | Adm1 | E-1838 | WK01   | 0.8723% | 0.002579 | 3.382074 |
| NB  | Adm1 | WK01   | GS136  | 1.0739% | 0.002824 | 3.803485 |
| SB  | Adm1 | WK01   | GS136  | 0.9717% | 0.002911 | 3.338367 |
| WH2 | Adm1 | WK01   | GS136  | 0.8906% | 0.002895 | 3.076274 |
| NB  | Adm1 | WK01   | E-1838 | 0.9564% | 0.002473 | 3.867222 |
| SB  | Adm1 | WK01   | E-1838 | 1.0016% | 0.002552 | 3.925382 |

|     |      |        |        |         |          |          |
|-----|------|--------|--------|---------|----------|----------|
| WH2 | Adm1 | WK01   | E-1838 | 0.8987% | 0.002555 | 3.517155 |
| NB  | Den  | GS136  | E-1838 | 1.0375% | 0.002891 | 3.589108 |
| SB  | Den  | GS136  | E-1838 | 1.0581% | 0.002972 | 3.559952 |
| WH2 | Den  | GS136  | E-1838 | 0.9562% | 0.003065 | 3.119511 |
| NB  | Den  | GS136  | WK01   | 0.9297% | 0.002901 | 3.204823 |
| SB  | Den  | GS136  | WK01   | 0.9396% | 0.002994 | 3.138012 |
| WH2 | Den  | GS136  | WK01   | 0.8338% | 0.002982 | 2.796235 |
| NB  | Den  | E-1838 | GS136  | 1.0824% | 0.002807 | 3.856251 |
| SB  | Den  | E-1838 | GS136  | 1.0350% | 0.002952 | 3.506096 |
| WH2 | Den  | E-1838 | GS136  | 0.9654% | 0.003017 | 3.199476 |
| NB  | Den  | E-1838 | HV74   | 1.8603% | 0.004215 | 4.413493 |
| SB  | Den  | E-1838 | HV74   | 1.7648% | 0.004353 | 4.053756 |
| WH2 | Den  | E-1838 | HV74   | 1.8146% | 0.004415 | 4.110223 |
| NB  | Den  | E-1838 | WK01   | 0.9604% | 0.002584 | 3.716929 |
| SB  | Den  | E-1838 | WK01   | 0.9768% | 0.002695 | 3.624504 |
| WH2 | Den  | E-1838 | WK01   | 0.9104% | 0.002685 | 3.390143 |
| NB  | Den  | WK01   | GS136  | 1.0227% | 0.002844 | 3.595708 |
| SB  | Den  | WK01   | GS136  | 0.9773% | 0.002938 | 3.325727 |
| WH2 | Den  | WK01   | GS136  | 0.8937% | 0.002939 | 3.040516 |
| NB  | Den  | WK01   | E-1838 | 0.9738% | 0.002564 | 3.797695 |
| SB  | Den  | WK01   | E-1838 | 0.9949% | 0.002664 | 3.735135 |
| WH2 | Den  | WK01   | E-1838 | 0.8979% | 0.002675 | 3.356452 |

| #   | Cave | Bear   | Ancestry | in       | Contemporary | Polar     | Bears |
|-----|------|--------|----------|----------|--------------|-----------|-------|
| SB  | NB   | GS136  | E-1838   | 0.0281%  | 0.000580     | 0.485292  |       |
| WH2 | NB   | GS136  | E-1838   | 0.0390%  | 0.000613     | 0.635845  |       |
| SB  | NB   | GS136  | WK01     | 0.0078%  | 0.000597     | 0.129906  |       |
| WH2 | NB   | GS136  | WK01     | 0.0081%  | 0.000589     | 0.136607  |       |
| SB  | NB   | E-1838 | GS136    | 0.0235%  | 0.000591     | 0.396740  |       |
| WH2 | NB   | E-1838 | GS136    | 0.0244%  | 0.000609     | 0.400609  |       |
| SB  | NB   | E-1838 | HV74     | 0.0677%  | 0.000809     | 0.836503  |       |
| WH2 | NB   | E-1838 | HV74     | 0.0206%  | 0.000815     | 0.252335  |       |
| SB  | NB   | E-1838 | WK01     | 0.0336%  | 0.000500     | 0.672148  |       |
| WH2 | NB   | E-1838 | WK01     | 0.0187%  | 0.000477     | 0.391349  |       |
| SB  | NB   | WK01   | GS136    | 0.0071%  | 0.000592     | 0.119062  |       |
| WH2 | NB   | WK01   | GS136    | 0.0190%  | 0.000596     | 0.319695  |       |
| SB  | NB   | WK01   | E-1838   | 0.0177%  | 0.000488     | 0.362102  |       |
| WH2 | NB   | WK01   | E-1838   | 0.0133%  | 0.000488     | 0.273470  |       |
| NB  | SB   | GS136  | E-1838   | -0.0281% | 0.000580     | -0.484888 |       |
| WH2 | SB   | GS136  | E-1838   | -0.0384% | 0.000580     | -0.662886 |       |
| NB  | SB   | GS136  | WK01     | -0.0078% | 0.000598     | -0.129787 |       |
| WH2 | SB   | GS136  | WK01     | -0.0406% | 0.000561     | -0.723943 |       |
| NB  | SB   | E-1838 | GS136    | -0.0235% | 0.000592     | -0.396453 |       |
| WH2 | SB   | E-1838 | GS136    | -0.0343% | 0.000582     | -0.589476 |       |
| NB  | SB   | E-1838 | HV74     | -0.0677% | 0.000811     | -0.835232 |       |
| WH2 | SB   | E-1838 | HV74     | -0.0669% | 0.000784     | -0.852876 |       |
| NB  | SB   | E-1838 | WK01     | -0.0336% | 0.000501     | -0.671439 |       |
| WH2 | SB   | E-1838 | WK01     | -0.0311% | 0.000473     | -0.657020 |       |
| NB  | SB   | WK01   | GS136    | -0.0071% | 0.000593     | -0.118961 |       |
| WH2 | SB   | WK01   | GS136    | -0.0211% | 0.000557     | -0.378645 |       |
| NB  | SB   | WK01   | E-1838   | -0.0177% | 0.000489     | -0.361780 |       |
| WH2 | SB   | WK01   | E-1838   | -0.0334% | 0.000473     | -0.704823 |       |
| NB  | WH2  | GS136  | E-1838   | -0.0390% | 0.000614     | -0.635455 |       |
| SB  | WH2  | GS136  | E-1838   | 0.0384%  | 0.000579     | 0.663178  |       |
| NB  | WH2  | GS136  | WK01     | -0.0081% | 0.000589     | -0.136592 |       |
| SB  | WH2  | GS136  | WK01     | 0.0406%  | 0.000560     | 0.724556  |       |
| NB  | WH2  | E-1838 | GS136    | -0.0244% | 0.000609     | -0.400476 |       |
| SB  | WH2  | E-1838 | GS136    | 0.0343%  | 0.000581     | 0.589727  |       |
| NB  | WH2  | E-1838 | HV74     | -0.0206% | 0.000816     | -0.252192 |       |
| SB  | WH2  | E-1838 | HV74     | 0.0668%  | 0.000783     | 0.853709  |       |
| NB  | WH2  | E-1838 | WK01     | -0.0187% | 0.000477     | -0.391283 |       |
| SB  | WH2  | E-1838 | WK01     | 0.0310%  | 0.000472     | 0.657598  |       |
| NB  | WH2  | WK01   | GS136    | -0.0190% | 0.000596     | -0.319618 |       |
| SB  | WH2  | WK01   | GS136    | 0.0211%  | 0.000556     | 0.378878  |       |
| NB  | WH2  | WK01   | E-1838   | -0.0133% | 0.000488     | -0.273445 |       |
| SB  | WH2  | WK01   | E-1838   | 0.0333%  | 0.000473     | 0.705414  |       |

</pre></body></html>
