# Supplementary material
Source: PubMed Central journal article supplement (PMC6590514)
Supplement: NIHMS1017233-supplement-Supplemental_data_6.pdf [file NIHMS1017233-supplement-Supplemental_data_6.pdf]

<html><head></head><body><pre style="word-wrap: break-word; white-space: pre-wrap;">#  
 Barlow et al. Supplementary Data 6: f-hat estimates of brown bear ancestry in European  
 cave bears, relative to the Caucasus cave bear kudarensis.

# In these tests: P1 is kudarensis, P2 is the measured European cave bear, and P3 and P4  
 are Eurasian brown bears.

# fhat values, weighted block jackknife standard error, and Zscore are presented in  
 adjacent columns with prefix "F", "SE" and "Z", respectively.

# Outgroup is U. thibetanus

| P1   | P2     | P3    | P4    | Fthibetanus | Sethibetanus | Zthibetanus |
|------|--------|-------|-------|-------------|--------------|-------------|
| HV74 | GS136  | 191Y  | 235   | 0.9630%     | 0.003375     | 2.853661    |
| HV74 | GS136  | Cau   | 235   | 1.0860%     | 0.003518     | 3.087319    |
| HV74 | GS136  | LS039 | 235   | 1.0833%     | 0.003419     | 3.168962    |
| HV74 | GS136  | Swe   | 235   | 0.9947%     | 0.003317     | 2.999125    |
| HV74 | GS136  | 235   | 191Y  | 0.6966%     | 0.003451     | 2.018909    |
| HV74 | GS136  | Cau   | 191Y  | 0.6477%     | 0.003469     | 1.866970    |
| HV74 | GS136  | LS039 | 191Y  | 0.5906%     | 0.003402     | 1.735842    |
| HV74 | GS136  | Swe   | 191Y  | 0.6775%     | 0.003332     | 2.033075    |
| HV74 | GS136  | 235   | Cau   | 0.6198%     | 0.003560     | 1.741013    |
| HV74 | GS136  | 191Y  | Cau   | 0.4677%     | 0.003502     | 1.335648    |
| HV74 | GS136  | LS039 | Cau   | 0.6003%     | 0.003573     | 1.680027    |
| HV74 | GS136  | Swe   | Cau   | 0.6556%     | 0.003547     | 1.848300    |
| HV74 | GS136  | 235   | LS039 | 1.0590%     | 0.003555     | 2.978914    |
| HV74 | GS136  | 191Y  | LS039 | 0.9275%     | 0.003414     | 2.716921    |
| HV74 | GS136  | Cau   | LS039 | 0.9758%     | 0.003664     | 2.663366    |
| HV74 | GS136  | Swe   | LS039 | 0.9531%     | 0.003452     | 2.760952    |
| HV74 | GS136  | 235   | Swe   | 0.9604%     | 0.003368     | 2.851687    |
| HV74 | GS136  | 191Y  | Swe   | 0.8795%     | 0.003372     | 2.608169    |
| HV74 | GS136  | Cau   | Swe   | 0.9446%     | 0.003465     | 2.726528    |
| HV74 | GS136  | LS039 | Swe   | 0.8760%     | 0.003417     | 2.563553    |
| HV74 | UD1838 | 191Y  | 235   | 0.6129%     | 0.002880     | 2.128170    |
| HV74 | UD1838 | Cau   | 235   | 0.6349%     | 0.002924     | 2.171302    |
| HV74 | UD1838 | LS039 | 235   | 0.6868%     | 0.002847     | 2.412001    |
| HV74 | UD1838 | Swe   | 235   | 0.6676%     | 0.002789     | 2.393806    |
| HV74 | UD1838 | 235   | 191Y  | 0.4732%     | 0.002886     | 1.639618    |
| HV74 | UD1838 | Cau   | 191Y  | 0.3743%     | 0.002945     | 1.271060    |
| HV74 | UD1838 | LS039 | 191Y  | 0.3834%     | 0.002845     | 1.347772    |
| HV74 | UD1838 | Swe   | 191Y  | 0.3871%     | 0.002785     | 1.390240    |
| HV74 | UD1838 | 235   | Cau   | 0.5574%     | 0.003103     | 1.796050    |
| HV74 | UD1838 | 191Y  | Cau   | 0.4430%     | 0.003033     | 1.460283    |
| HV74 | UD1838 | LS039 | Cau   | 0.4690%     | 0.003051     | 1.537184    |
| HV74 | UD1838 | Swe   | Cau   | 0.4849%     | 0.003019     | 1.606271    |
| HV74 | UD1838 | 235   | LS039 | 0.7022%     | 0.002988     | 2.349834    |
| HV74 | UD1838 | 191Y  | LS039 | 0.5565%     | 0.002947     | 1.888582    |
| HV74 | UD1838 | Cau   | LS039 | 0.6037%     | 0.003079     | 1.960619    |
| HV74 | UD1838 | Swe   | LS039 | 0.5716%     | 0.002883     | 1.982454    |
| HV74 | UD1838 | 235   | Swe   | 0.6326%     | 0.002839     | 2.228586    |
| HV74 | UD1838 | 191Y  | Swe   | 0.4866%     | 0.002897     | 1.679671    |
| HV74 | UD1838 | Cau   | Swe   | 0.5064%     | 0.002951     | 1.716131    |
| HV74 | UD1838 | LS039 | Swe   | 0.5238%     | 0.002841     | 1.843592    |
| HV74 | WK01   | 191Y  | 235   | 0.8653%     | 0.002816     | 3.073217    |
| HV74 | WK01   | Cau   | 235   | 0.9578%     | 0.002911     | 3.290830    |
| HV74 | WK01   | LS039 | 235   | 0.9559%     | 0.002749     | 3.477224    |
| HV74 | WK01   | Swe   | 235   | 0.9275%     | 0.002732     | 3.394660    |
| HV74 | WK01   | 235   | 191Y  | 0.8234%     | 0.002819     | 2.920696    |
| HV74 | WK01   | Cau   | 191Y  | 0.7760%     | 0.002890     | 2.684977    |
| HV74 | WK01   | LS039 | 191Y  | 0.6390%     | 0.002784     | 2.295250    |
| HV74 | WK01   | Swe   | 191Y  | 0.7792%     | 0.002750     | 2.833105    |
| HV74 | WK01   | 235   | Cau   | 0.8960%     | 0.003073     | 2.915331    |

|      |      |       |       |         |          |          |
|------|------|-------|-------|---------|----------|----------|
| HV74 | WK01 | 191Y  | Cau   | 0.7520% | 0.002978 | 2.525271 |
| HV74 | WK01 | LS039 | Cau   | 0.7688% | 0.003017 | 2.548435 |
| HV74 | WK01 | Swe   | Cau   | 0.7877% | 0.002969 | 2.652761 |
| HV74 | WK01 | 235   | LS039 | 0.9140% | 0.002910 | 3.140956 |
| HV74 | WK01 | 191Y  | LS039 | 0.6946% | 0.002881 | 2.410492 |
| HV74 | WK01 | Cau   | LS039 | 0.8240% | 0.003020 | 2.728475 |
| HV74 | WK01 | Swe   | LS039 | 0.7578% | 0.002819 | 2.687951 |
| HV74 | WK01 | 235   | Swe   | 0.9238% | 0.002799 | 3.300178 |
| HV74 | WK01 | 191Y  | Swe   | 0.8423% | 0.002845 | 2.960879 |
| HV74 | WK01 | Cau   | Swe   | 0.8578% | 0.002945 | 2.912616 |
| HV74 | WK01 | LS039 | Swe   | 0.7170% | 0.002806 | 2.555505 |

</pre></body></html>
